# Supplementary material for: Synthesis of Novel Symmetrical 1,4-Disubstituted 1,2,3-Bistriazole Derivatives via ‘Click Chemistry’ and Their Biological Evaluation
Source: PubMed Central journal article supplement (PMC6274262; doi:10.3390/molecules21050659), 2016-05-19
Supplement: molecules-21-00659-s001.pdf [file molecules-21-00659-s001.pdf]

# Supplementary Materials: Synthesis of Novel Symmetrical 1,4-Disubstituted 1,2,3-Bistriazole Derivatives via 'Click Chemistry' and Biological Evaluation

Esra Düğdü, Dilek Ünlüer, Fatih Çelik, Kemal Sancak, Şengül Alpay, Karaoğlu and Arzu Özel

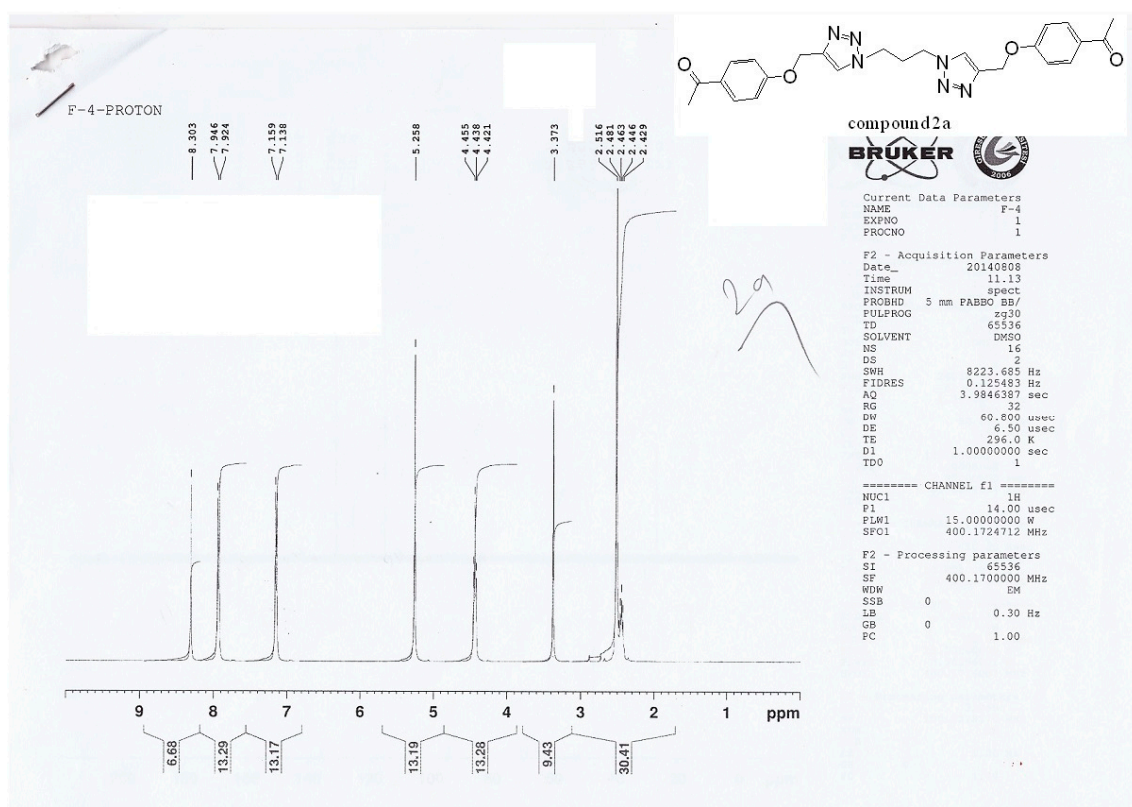

Figure S1. <sup>1</sup>H-NMR spectrum of compound 2a.

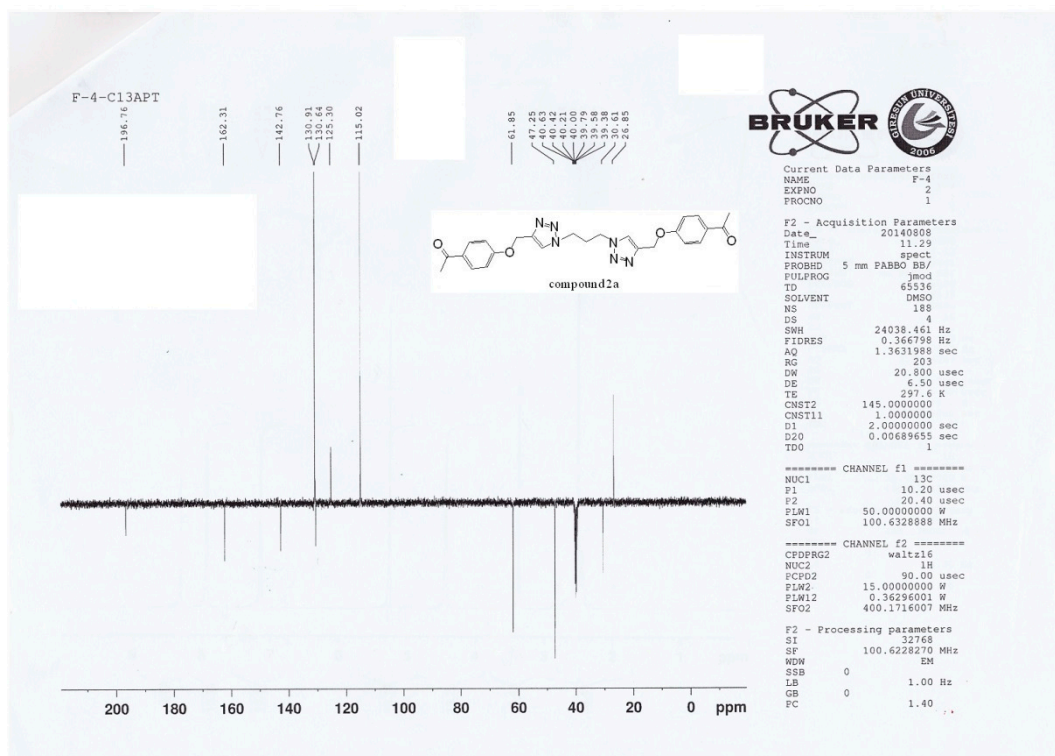Figure S2. <sup>13</sup>C-NMR spectrum of compound 2a.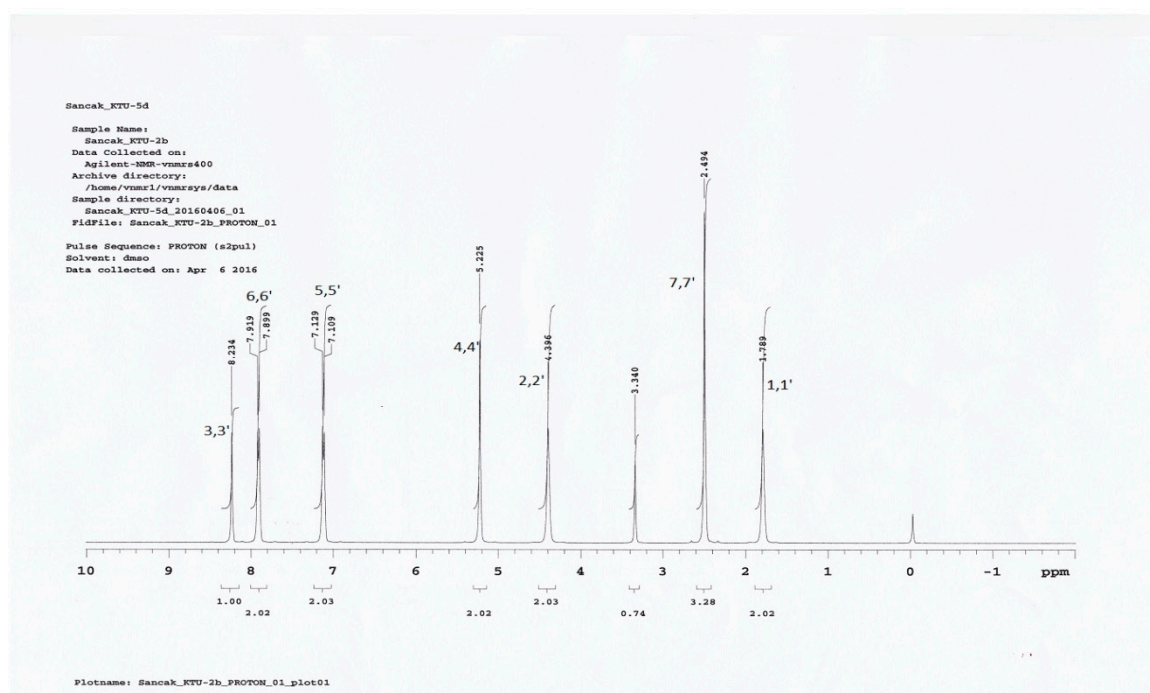Figure S3. <sup>1</sup>H-NMR spectrum of compound 2b.

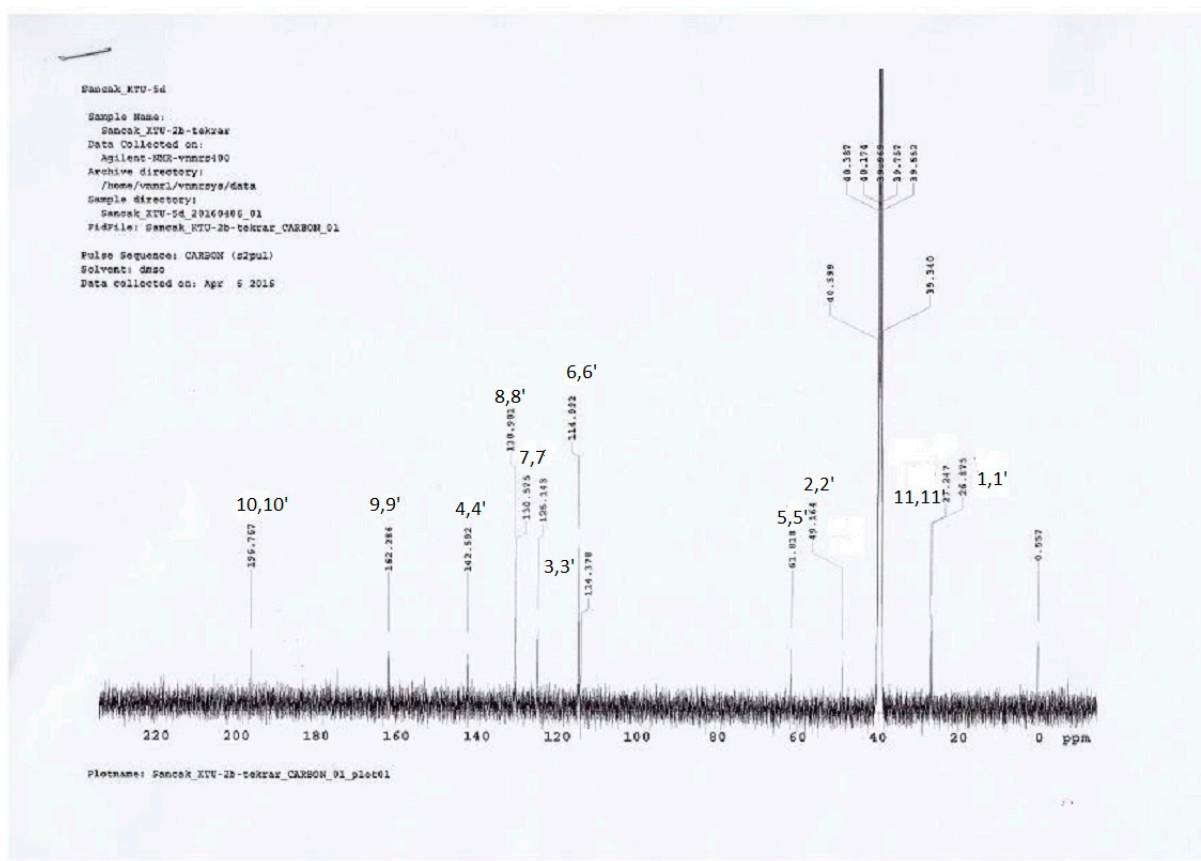Figure S4.  $^{13}\text{C}$ -NMR spectrum of compound 2b.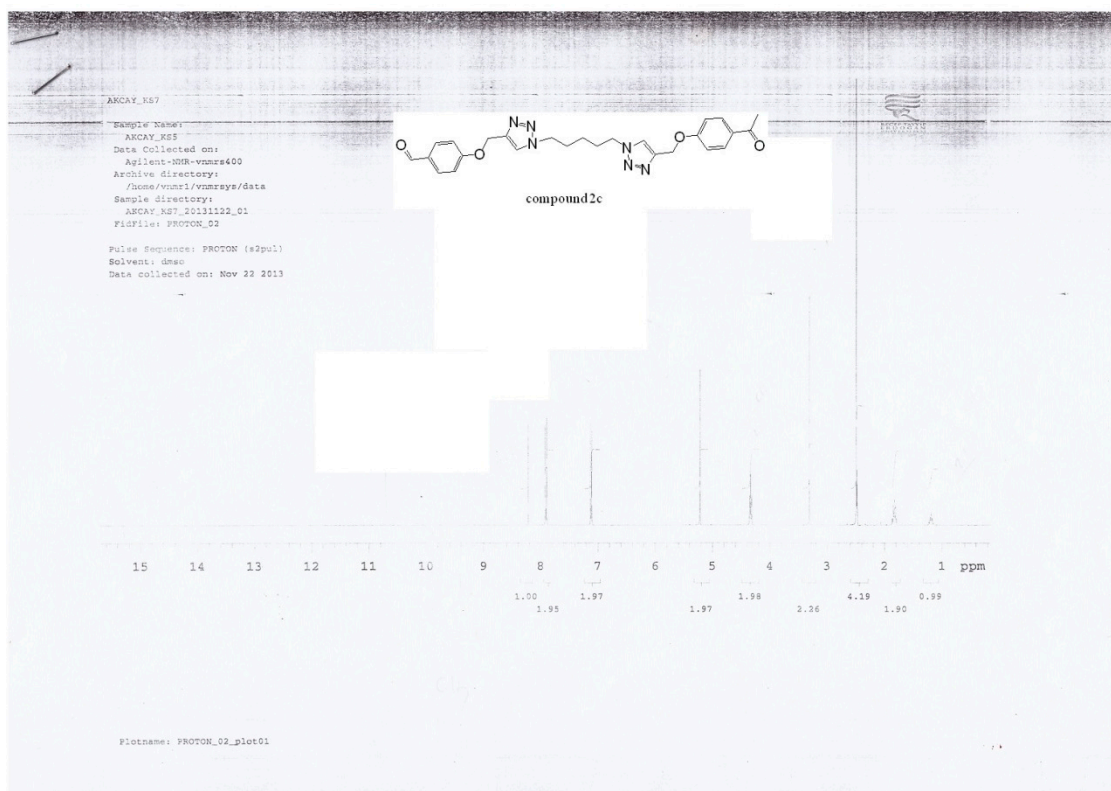Figure S5.  $^1\text{H}$ -NMR spectrum of compound 2c.

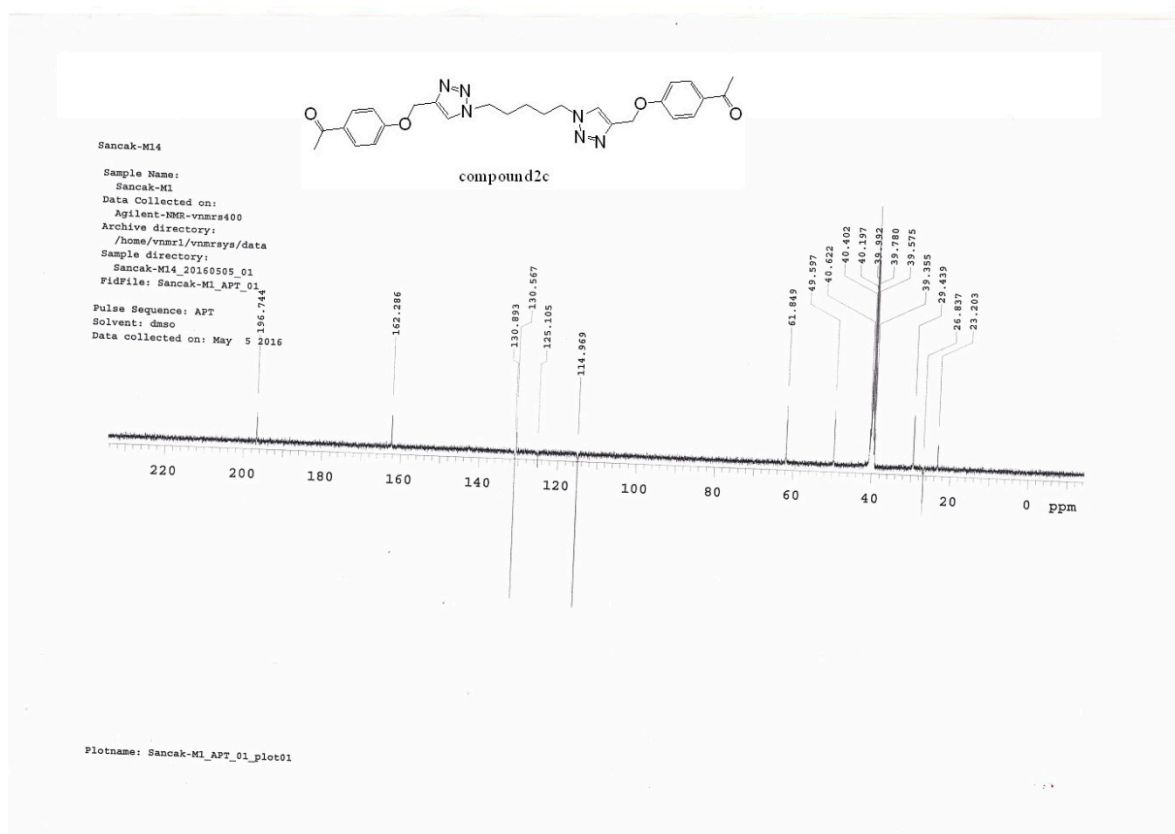Figure S6.  $^{13}\text{C}$ -NMR spectrum of compound 2c.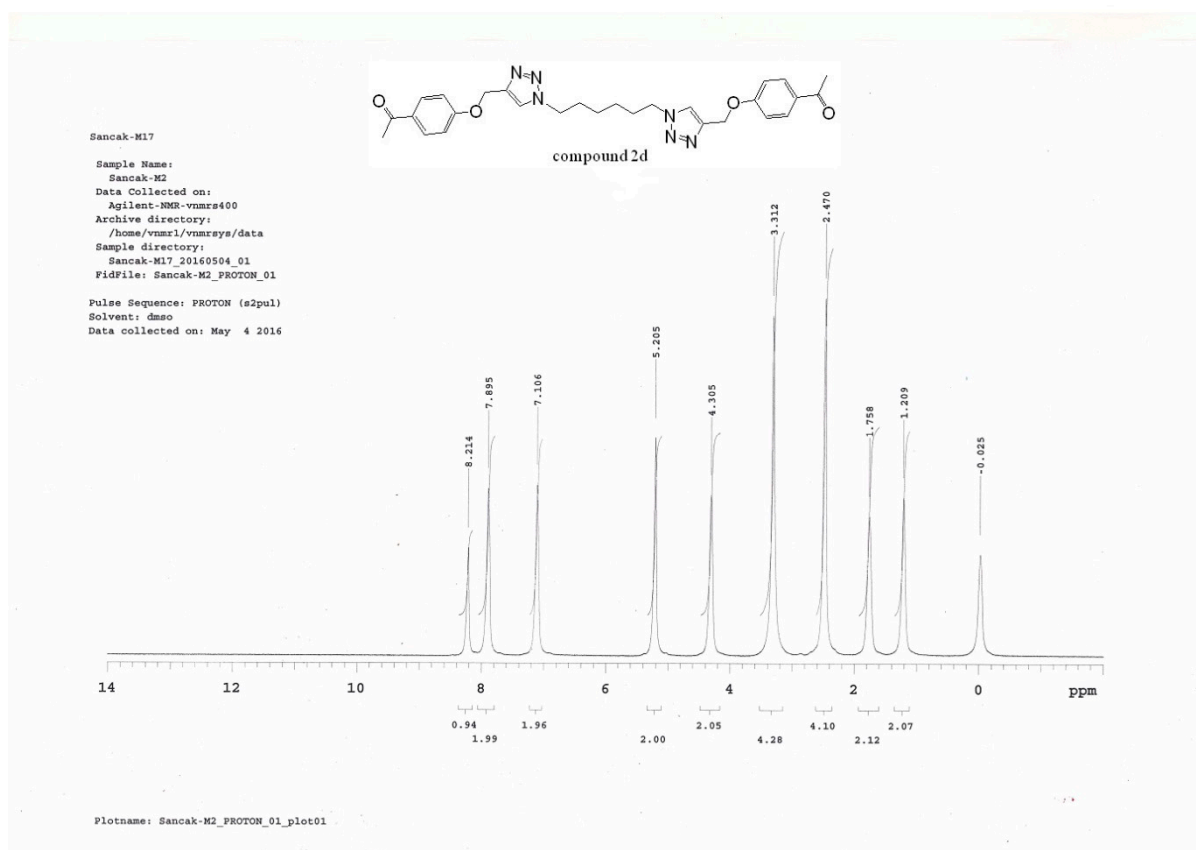Figure S7.  $^1\text{H}$ -NMR spectrum of compound 2d.



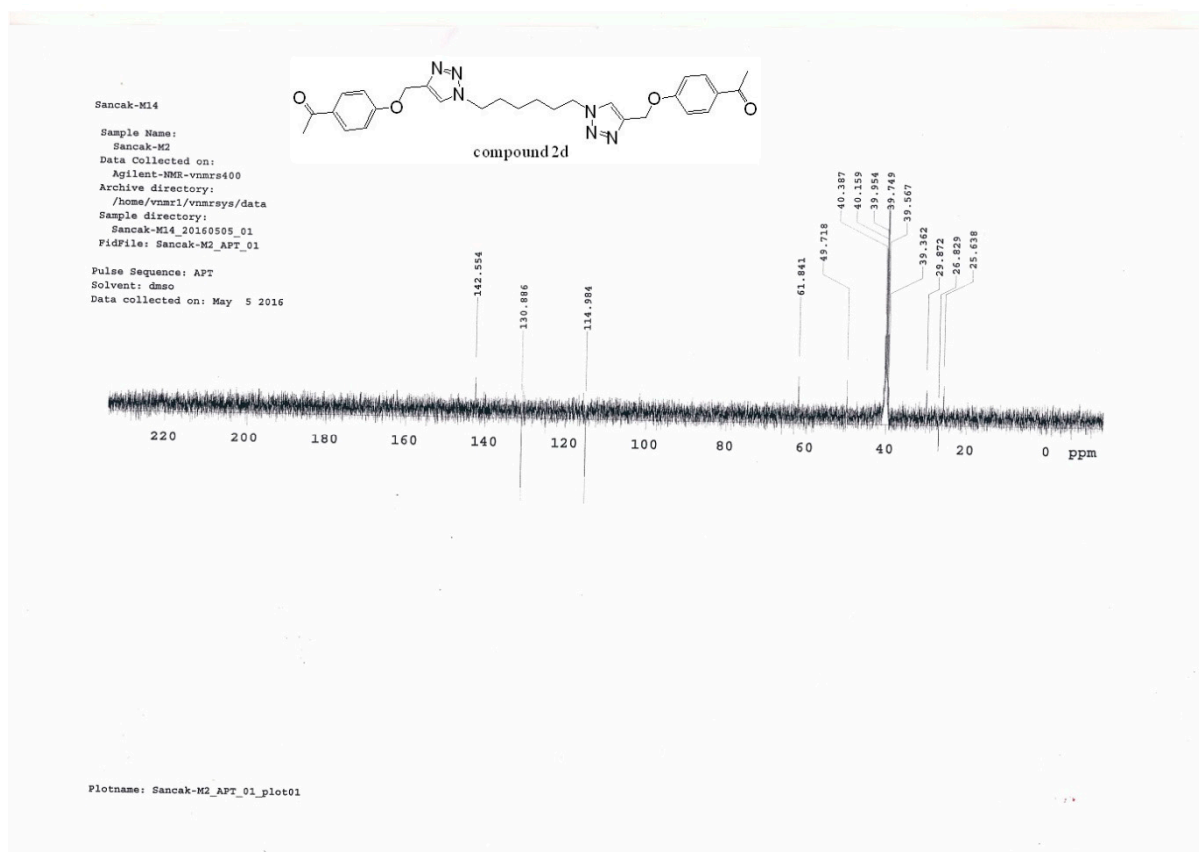Figure S8.  $^{13}\text{C}$ -NMR spectrum of compound 2d.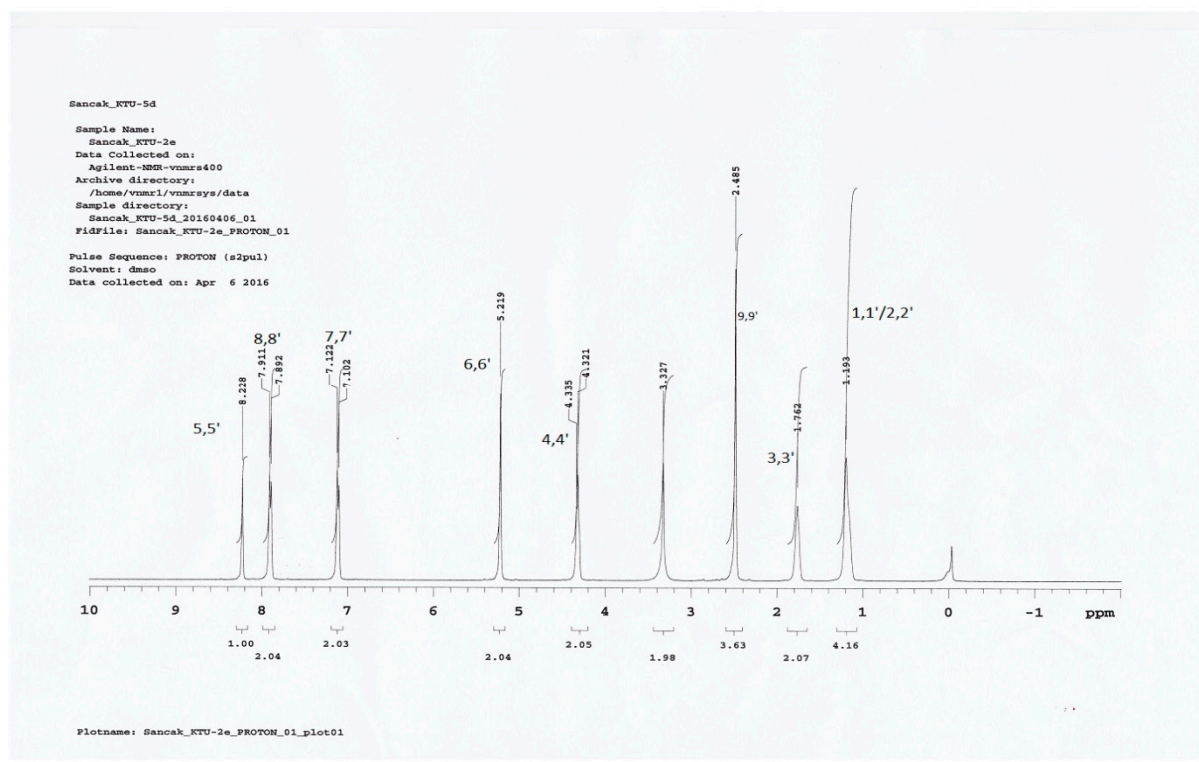Figure S9.  $^1\text{H}$ -NMR spectrum of compound 2e.

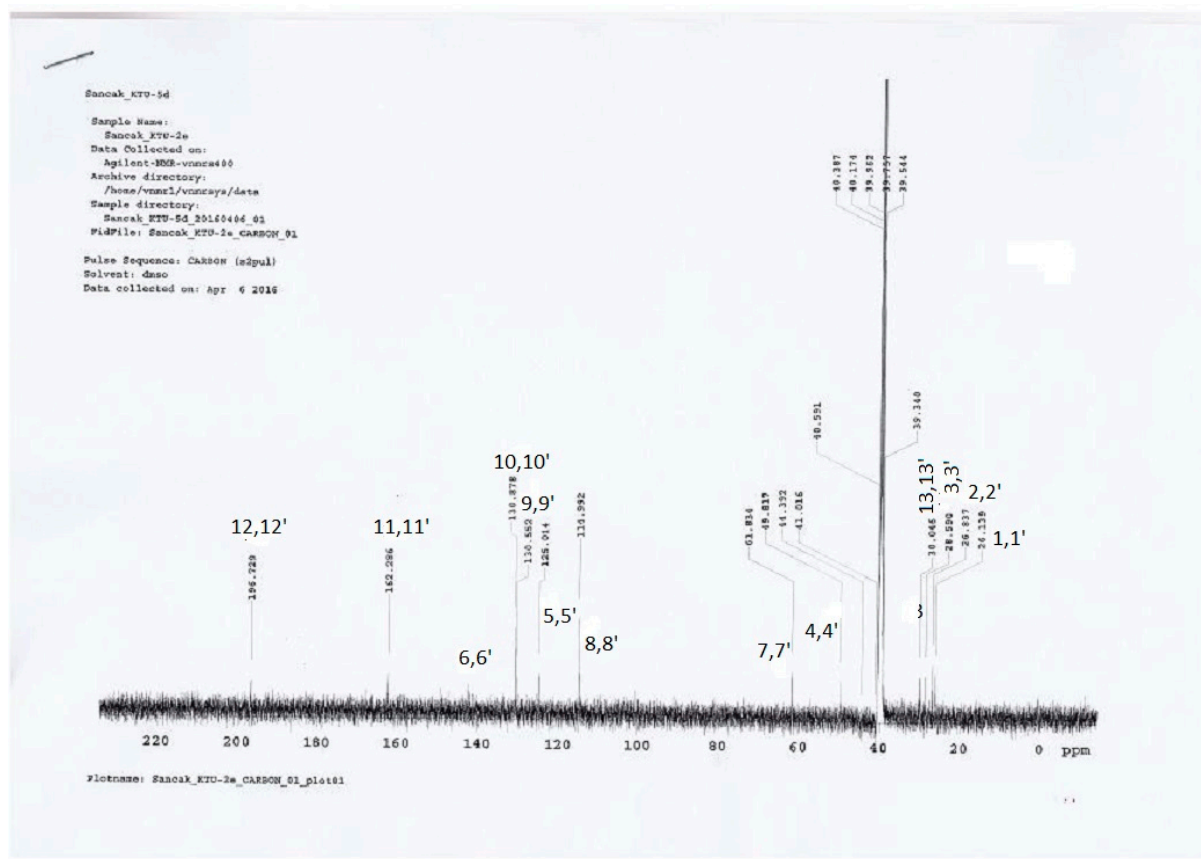Figure S10.  $^{13}\text{C}$ -NMR spectrum of compound 2e.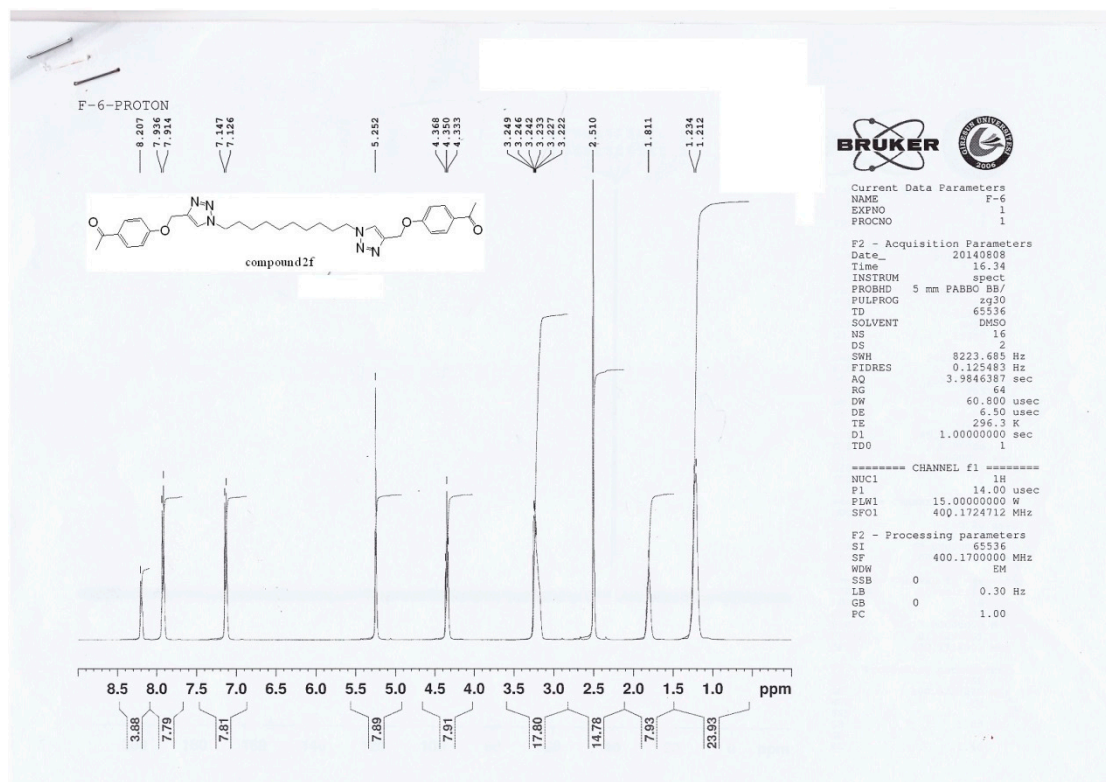Figure S11.  $^1\text{H}$ -NMR spectrum of compound 2f.

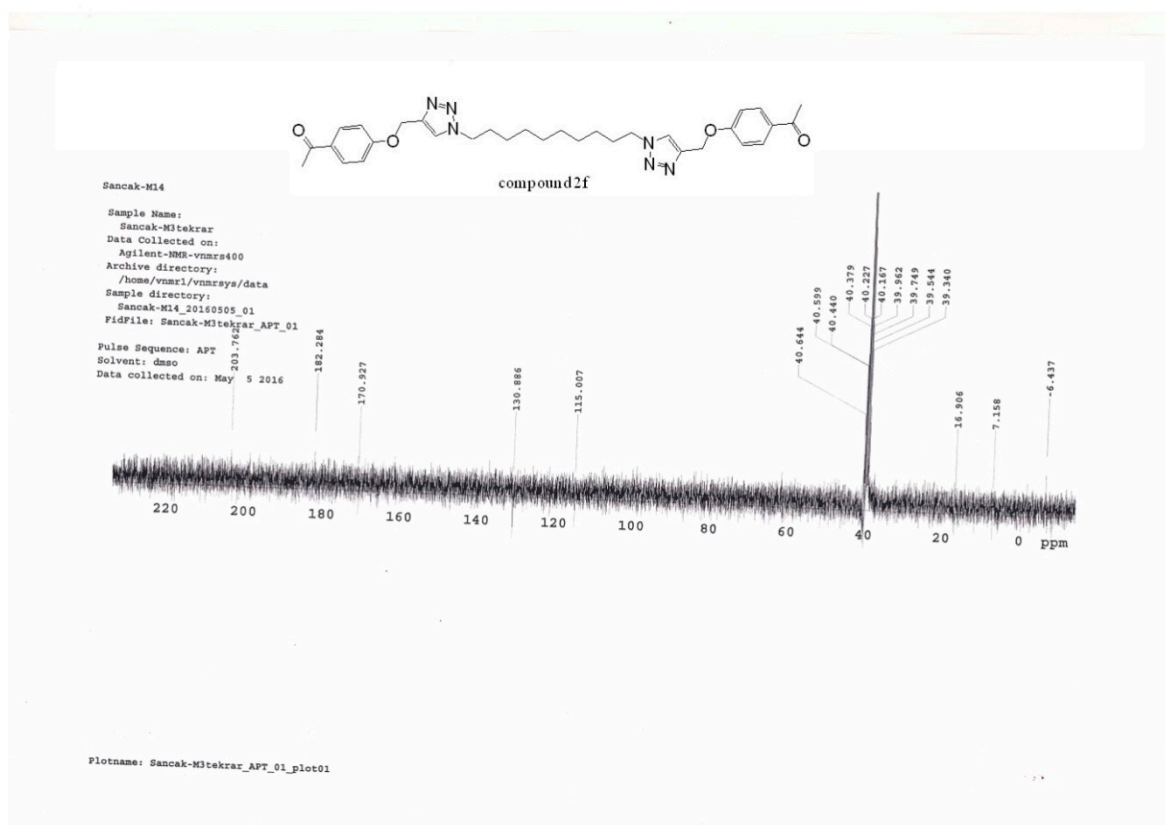Figure S12.  $^{13}\text{C}$ -NMR spectrum of compound 2f.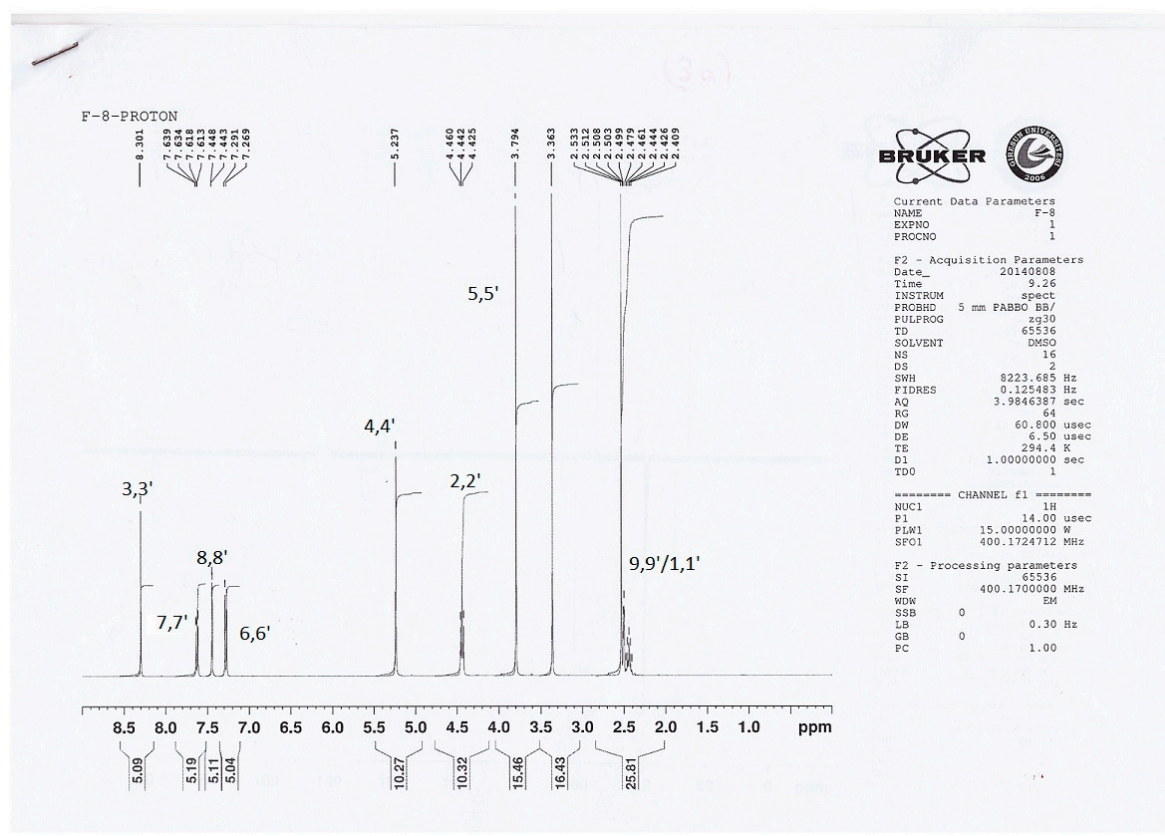Figure S13.  $^1\text{H}$ -NMR spectrum of compound 3a.



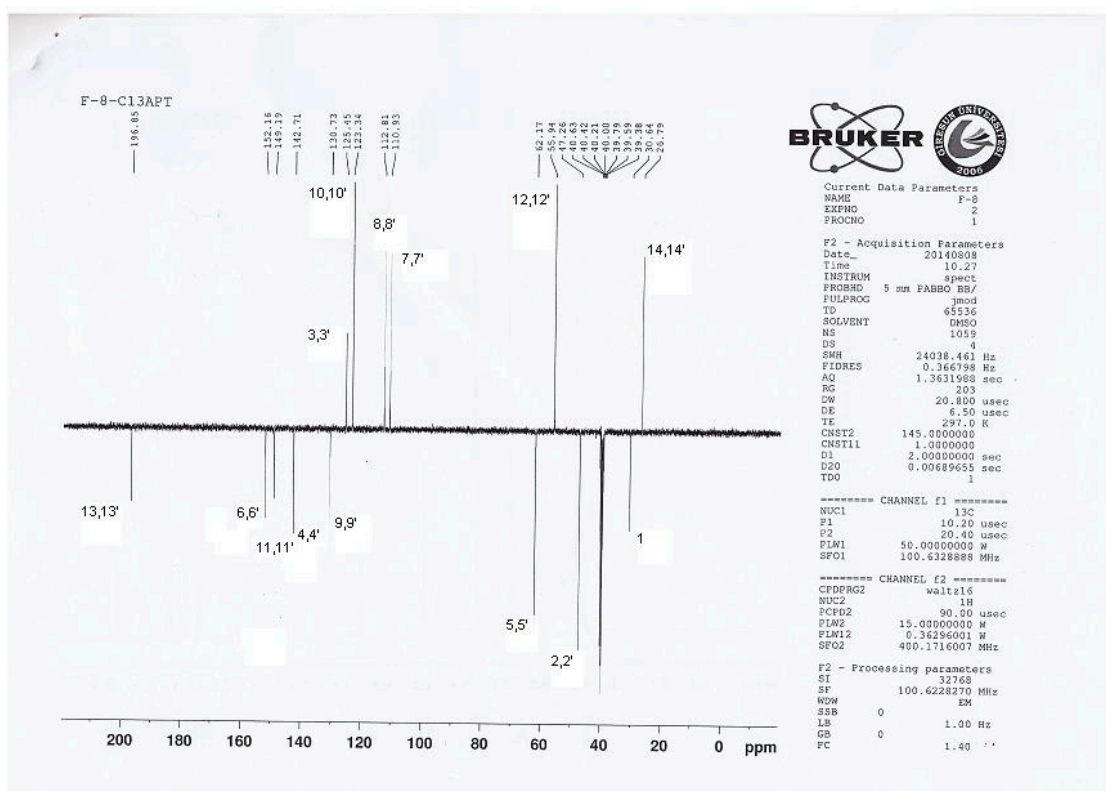

**Figure S14.** <sup>13</sup>C-NMR spectrum of compound 3a.

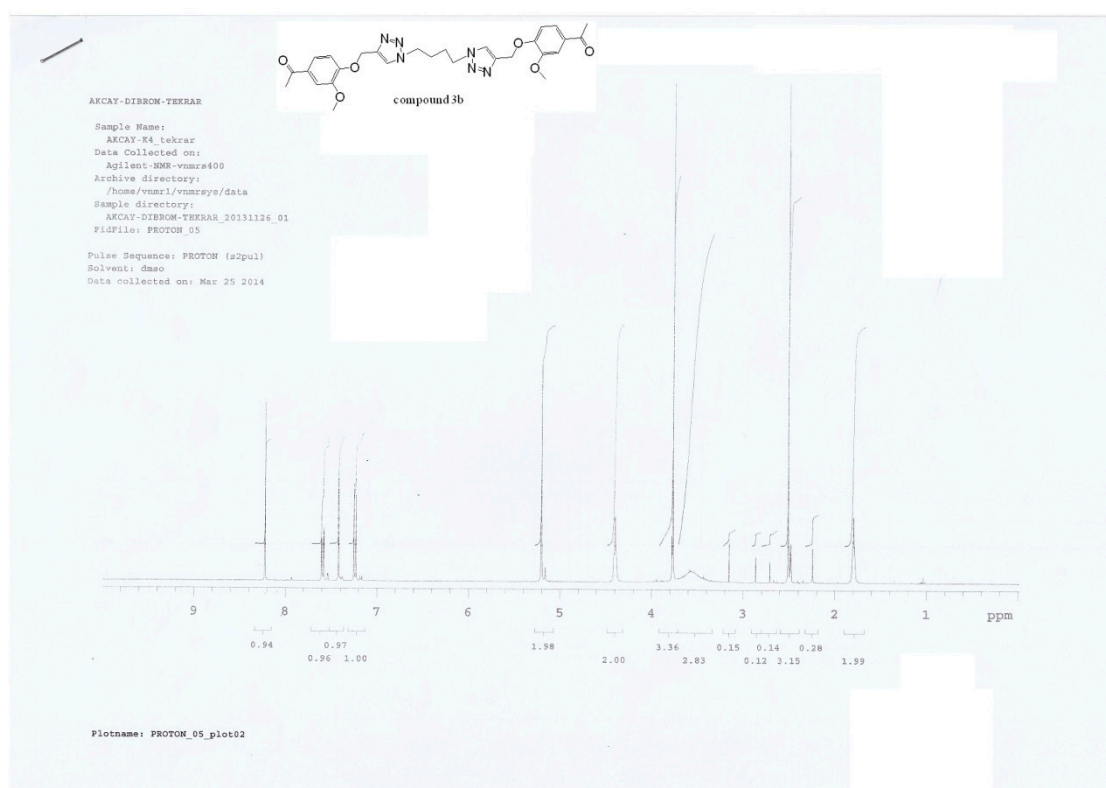

**Figure S15.** <sup>1</sup>H-NMR spectrum of compound 3b.



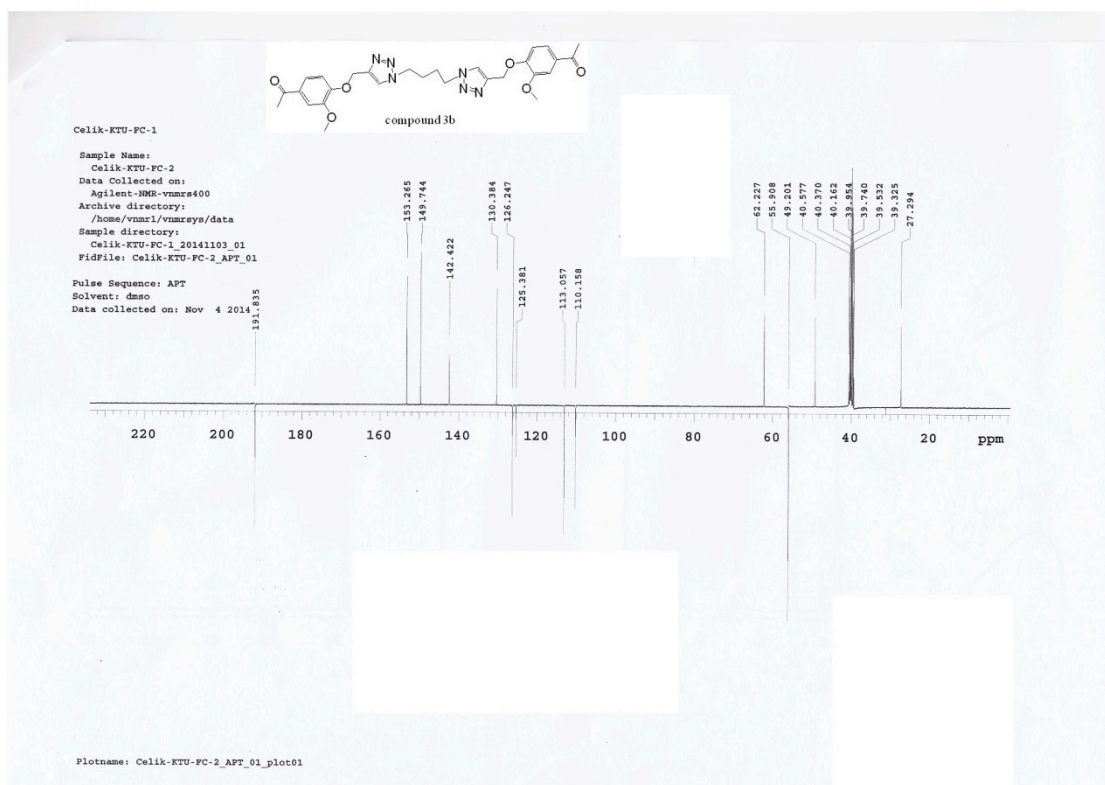Figure S16.  $^{13}\text{C}$ -NMR spectrum of compound 3b.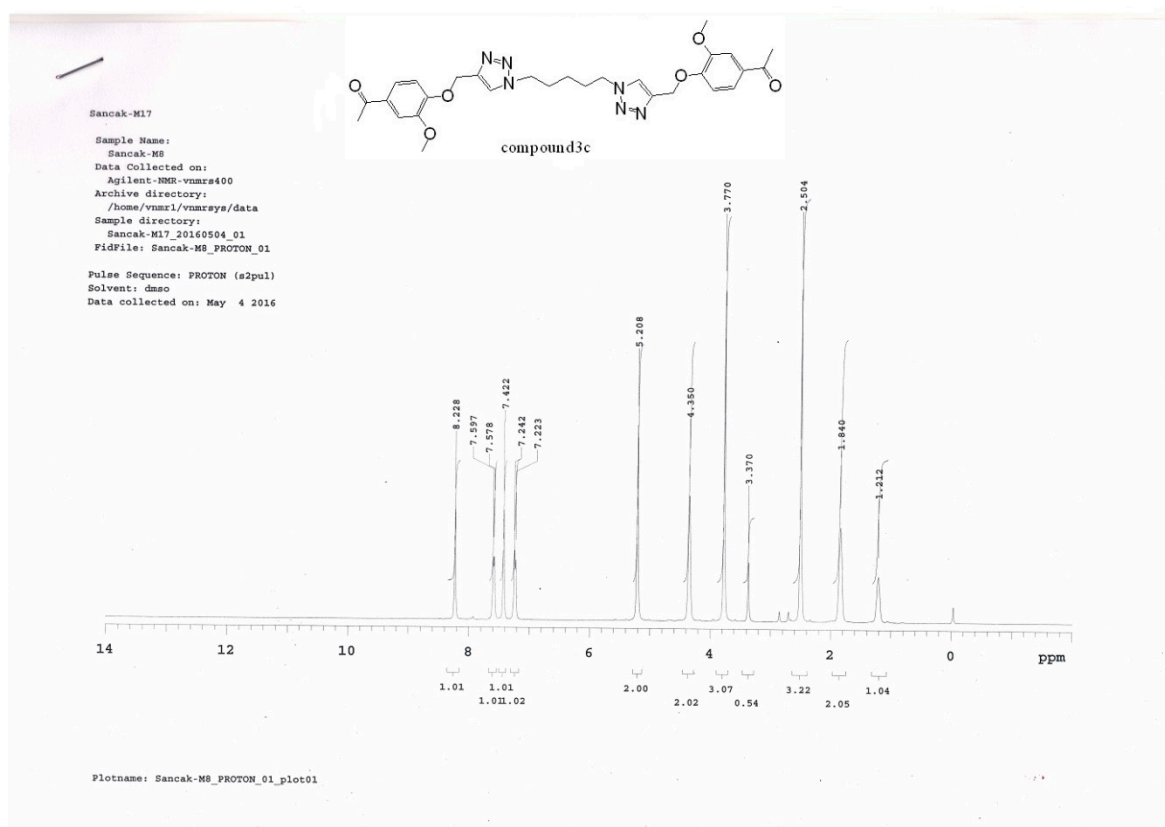Figure S17.  $^1\text{H}$ -NMR spectrum of compound 3c.

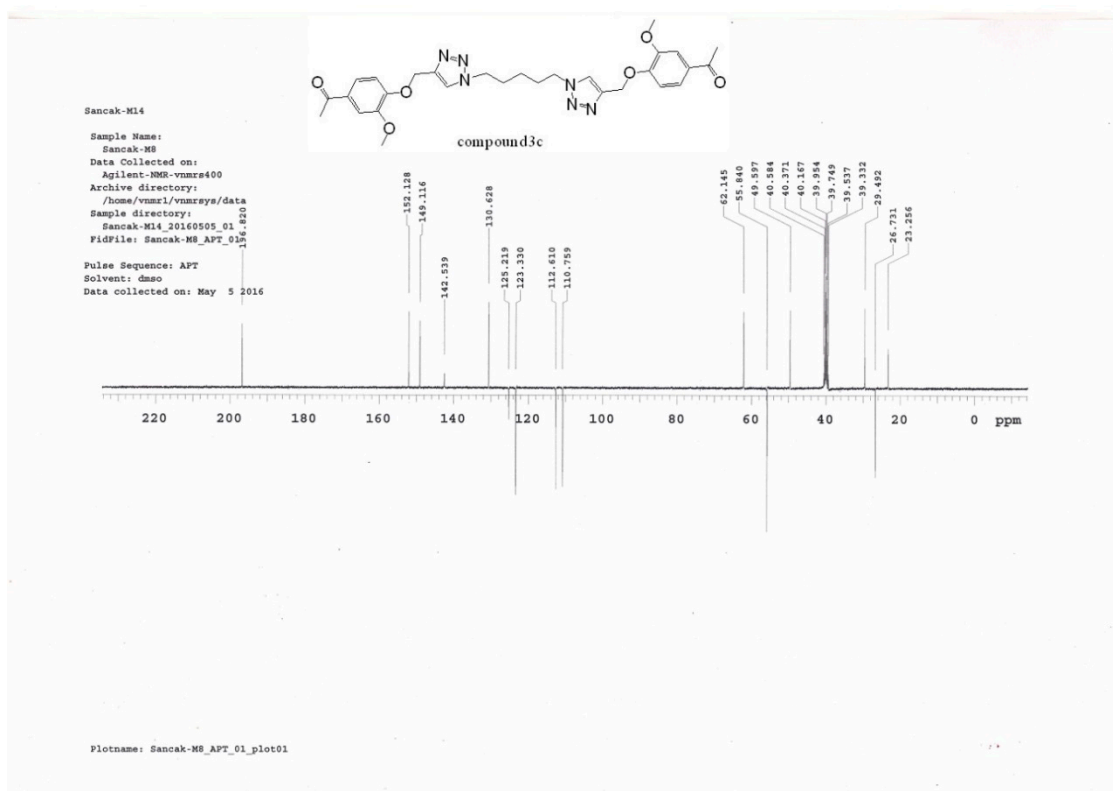Figure S18.  $^{13}\text{C}$ -NMR spectrum of compound 3c.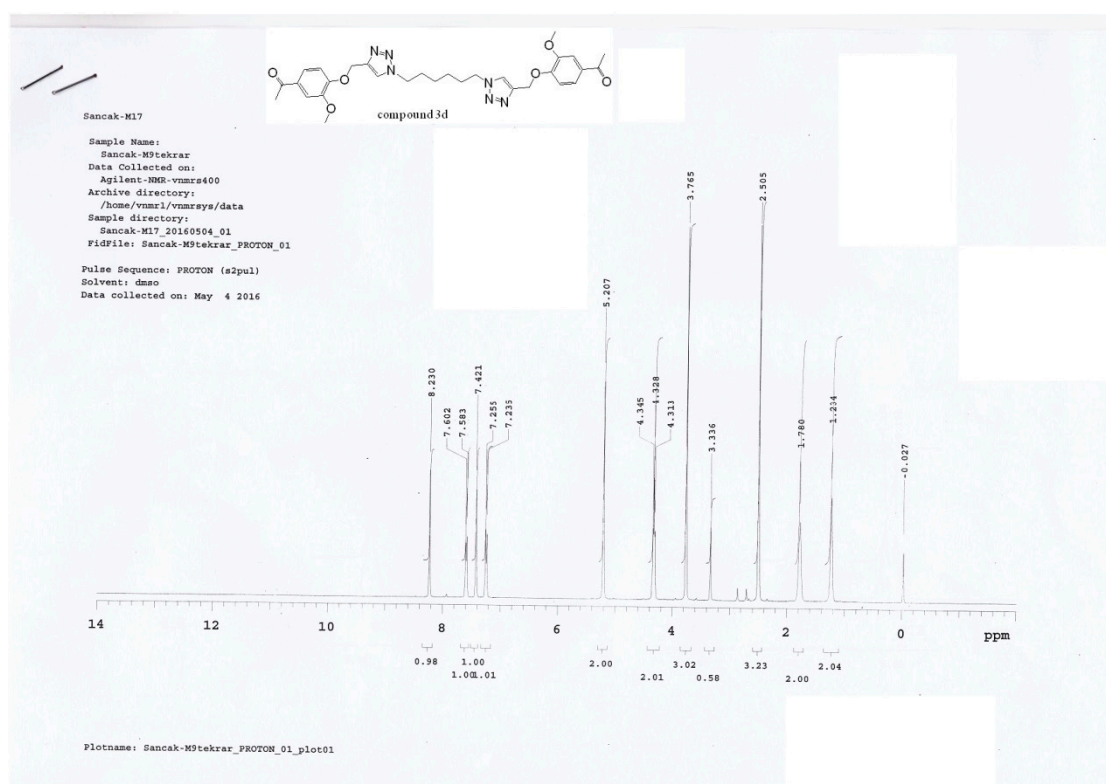Figure S19.  $^1\text{H}$ -NMR spectrum of compound 3d.

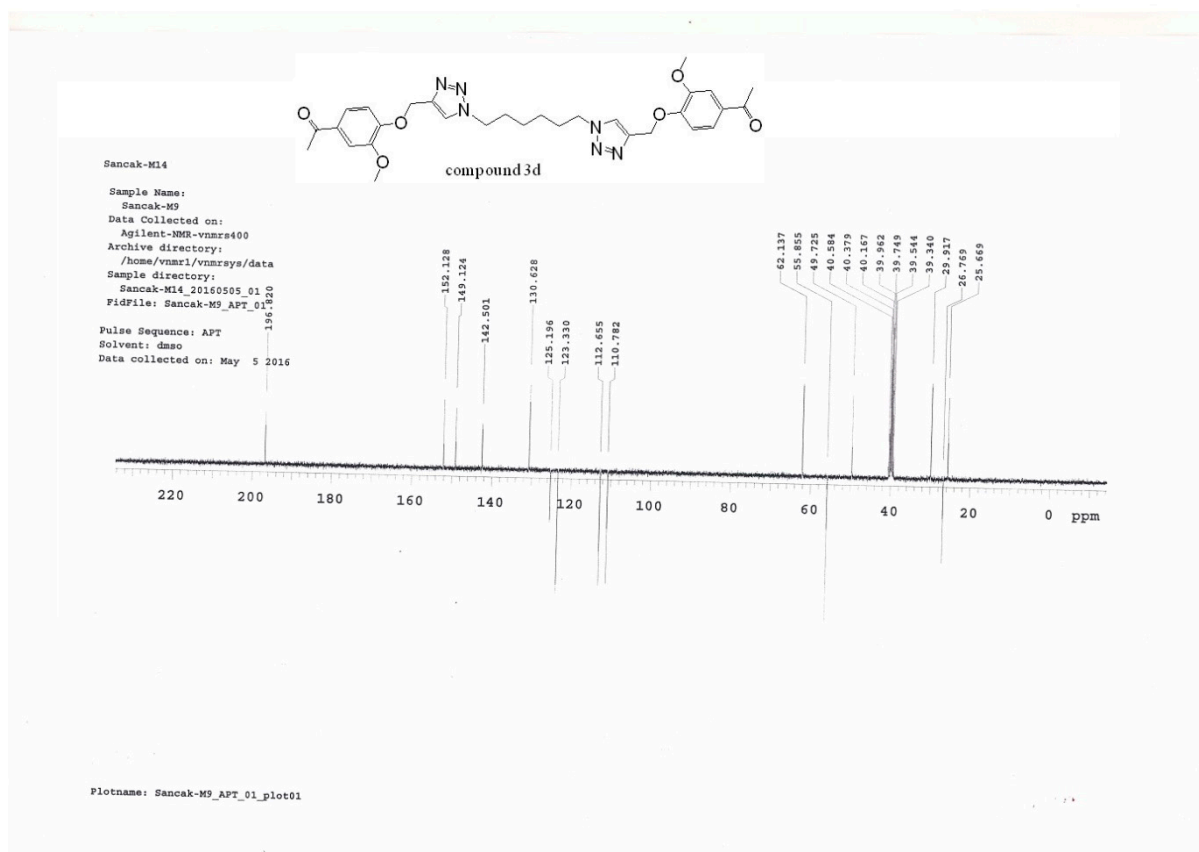Figure S20.  $^{13}\text{C}$ -NMR spectrum of compound 3d.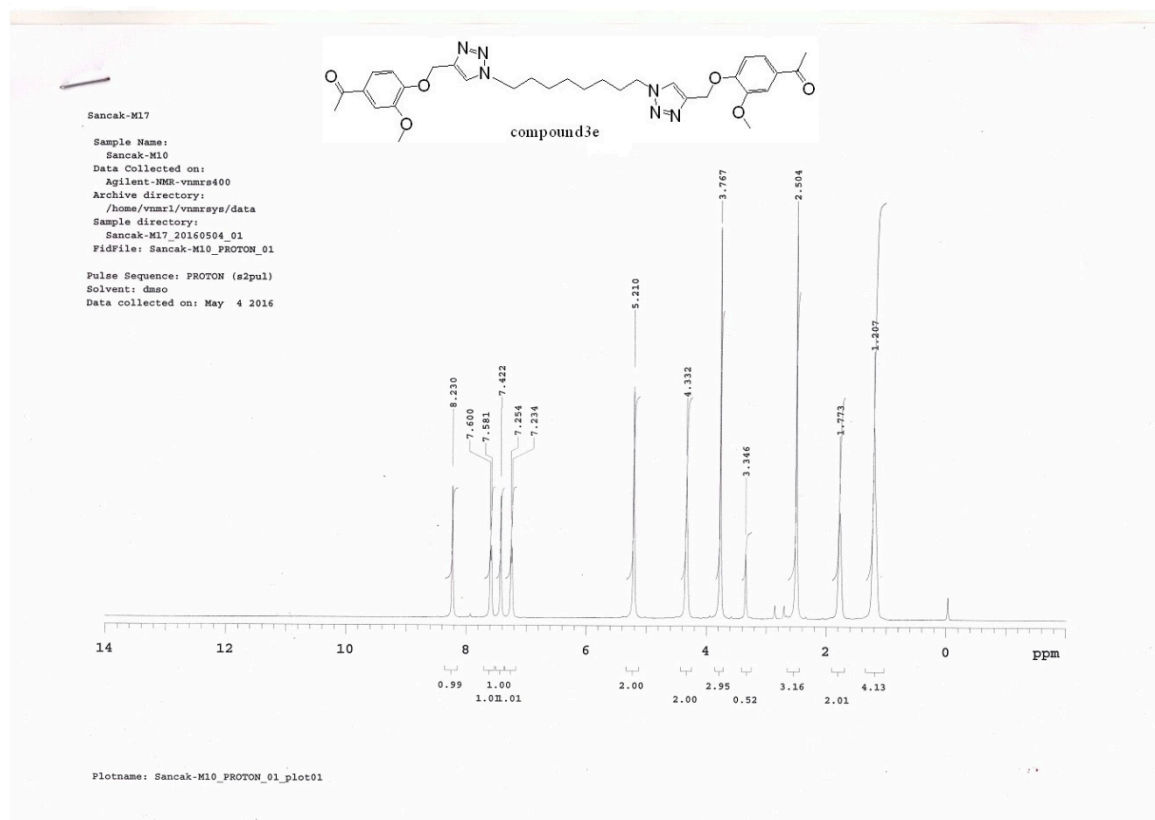Figure S21.  $^1\text{H}$ -NMR spectrum of compound 3e.



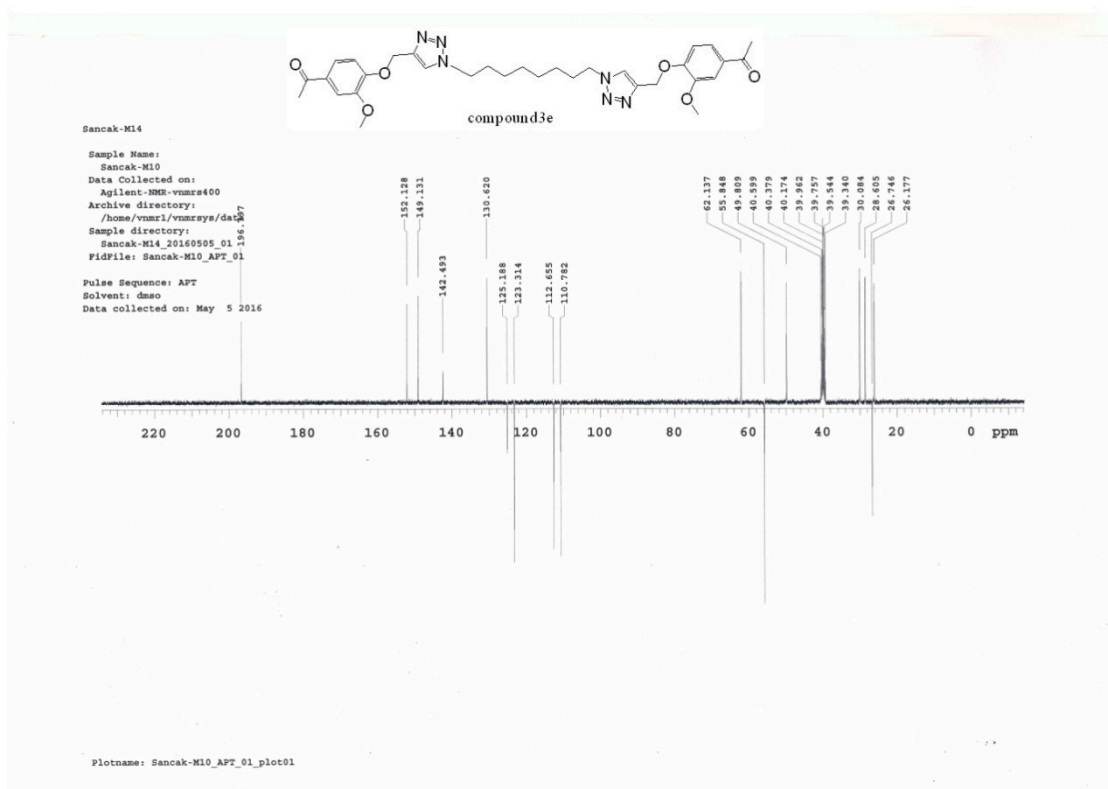Figure S22. <sup>13</sup>C-NMR spectrum of compound 3e.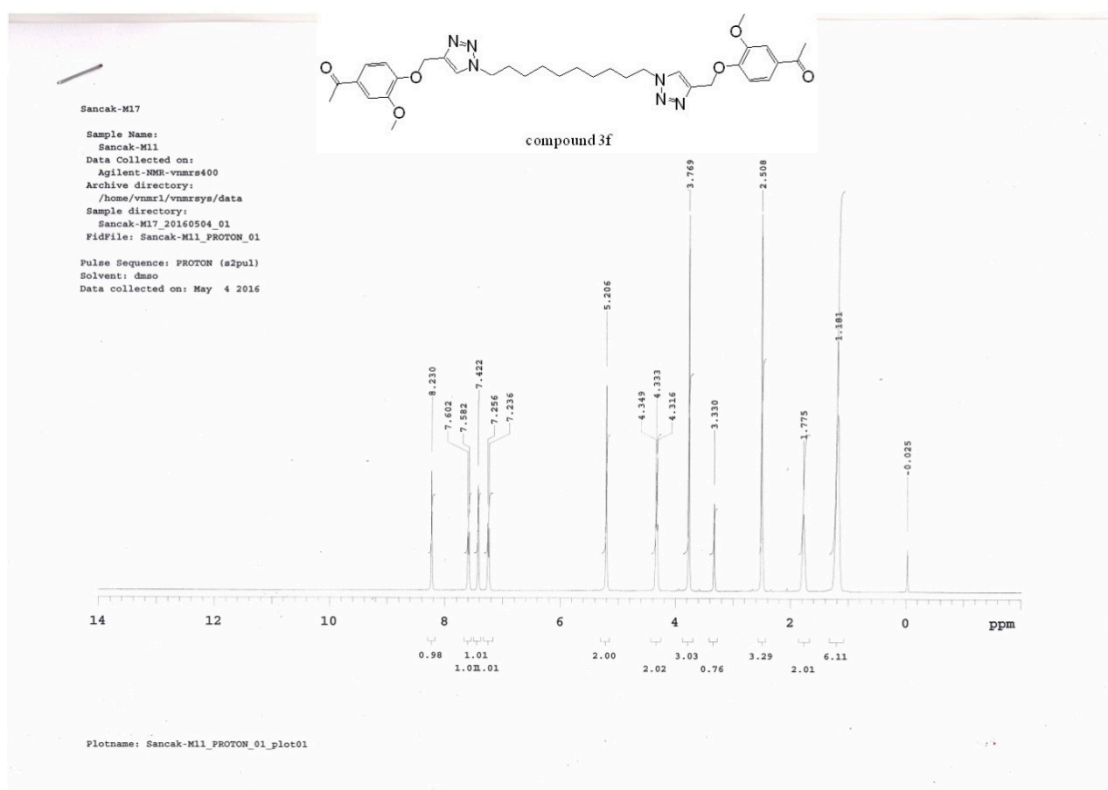Figure S23. <sup>1</sup>H-NMR spectrum of compound 3f.

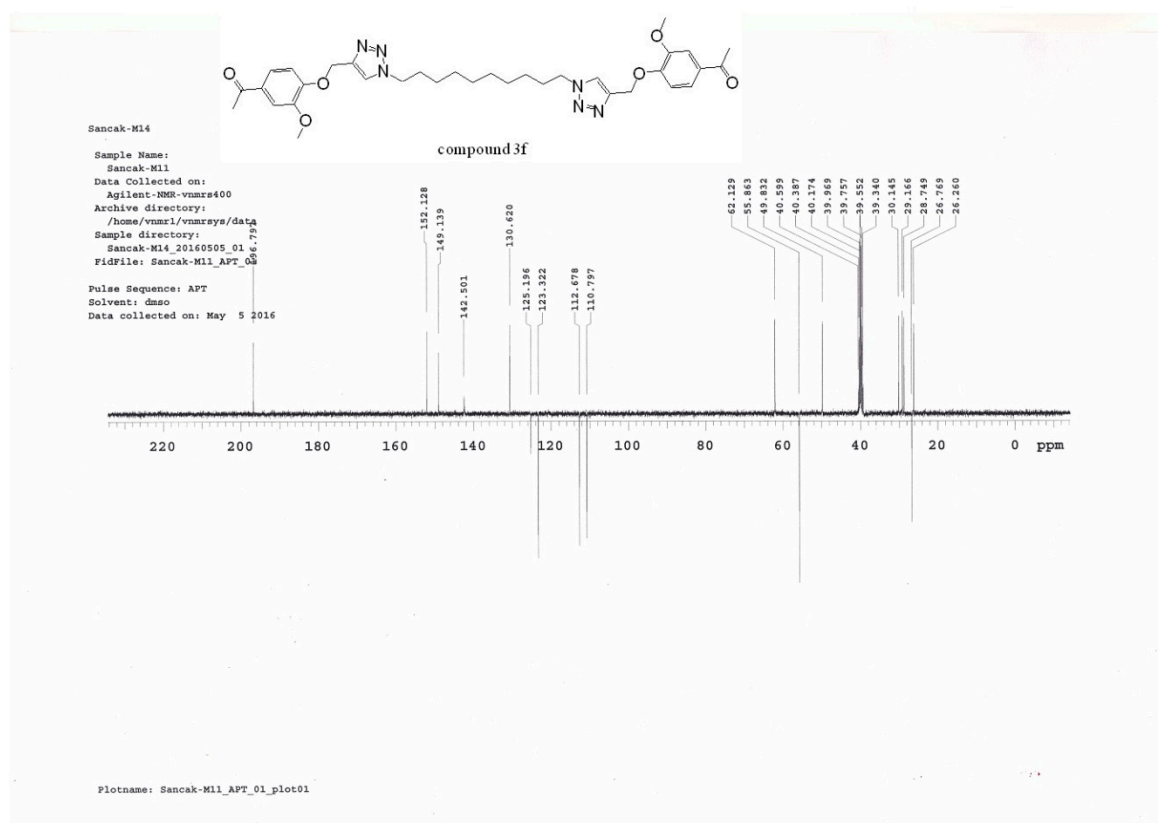Figure S24.  $^{13}\text{C}$ -NMR spectrum of compound 3f.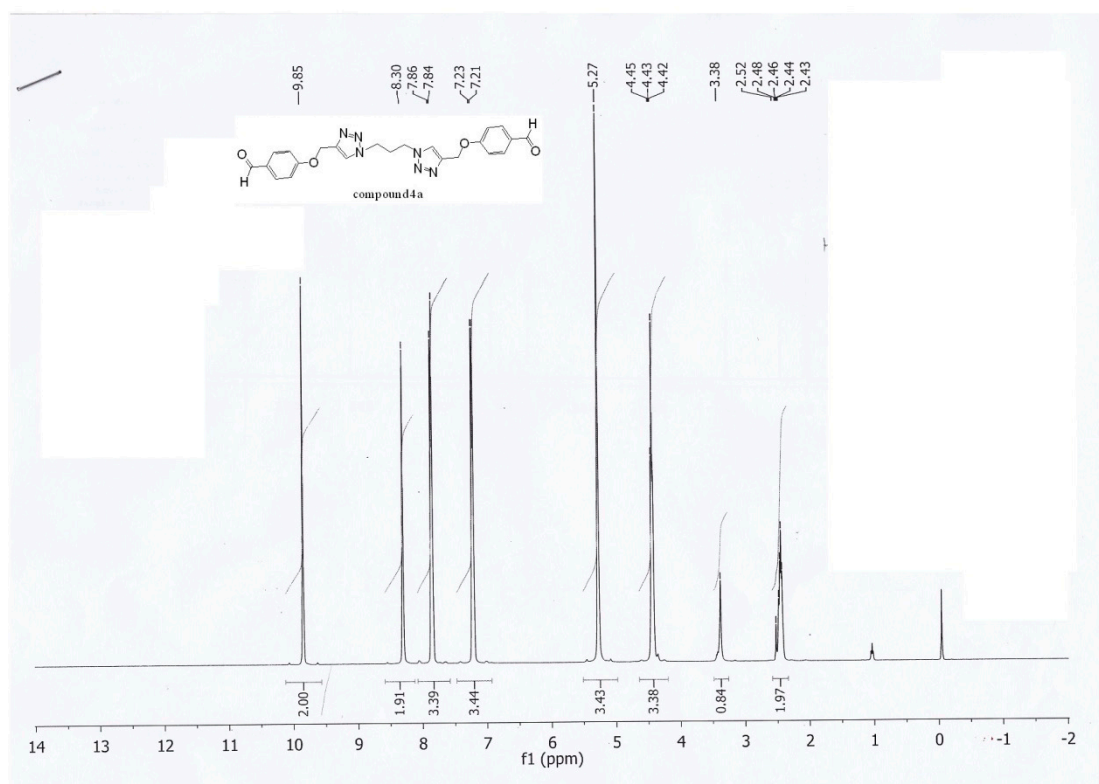Figure S25.  $^1\text{H}$ -NMR spectrum of compound 4a.

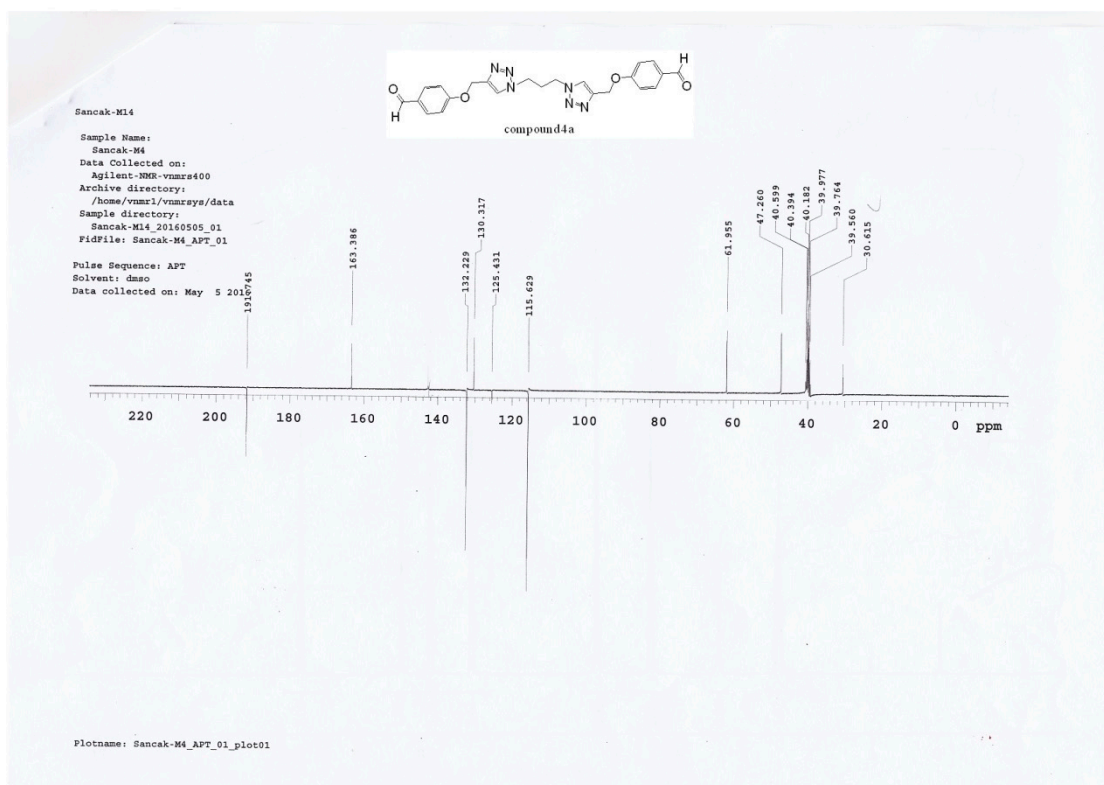Figure S26.  $^{13}\text{C}$ -NMR spectrum of compound 4a.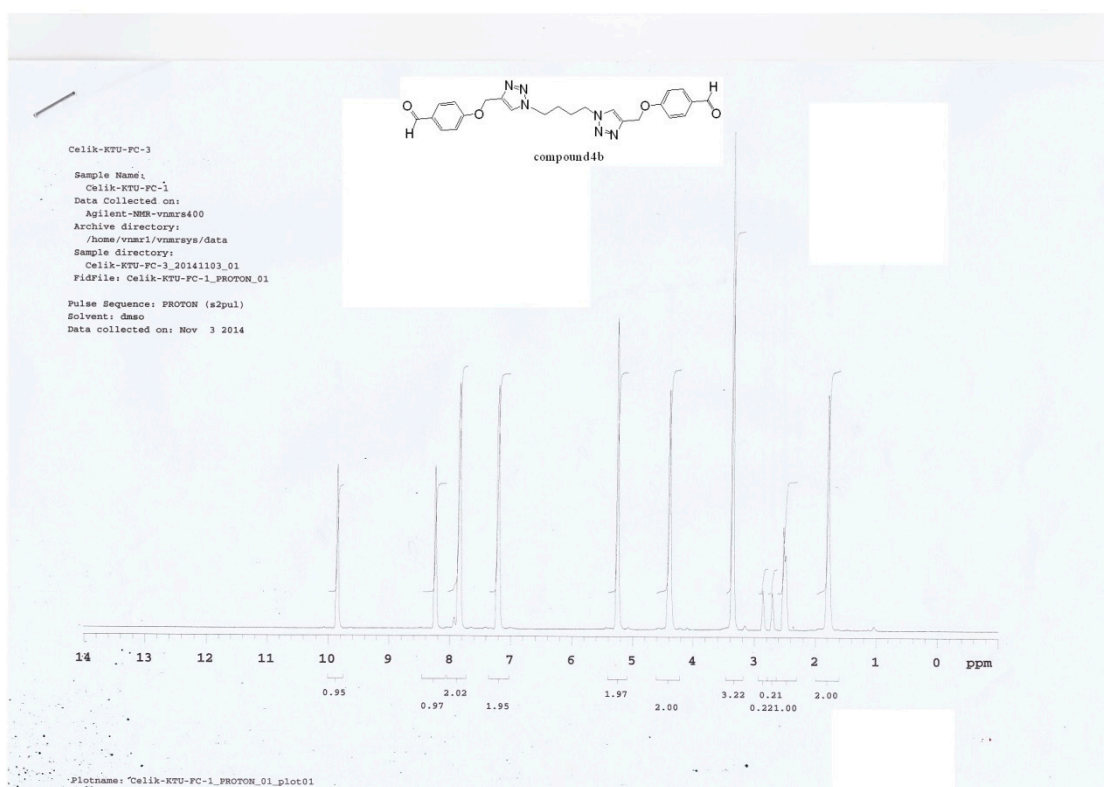Figure S27.  $^1\text{H}$ -NMR spectrum of compound 4b.



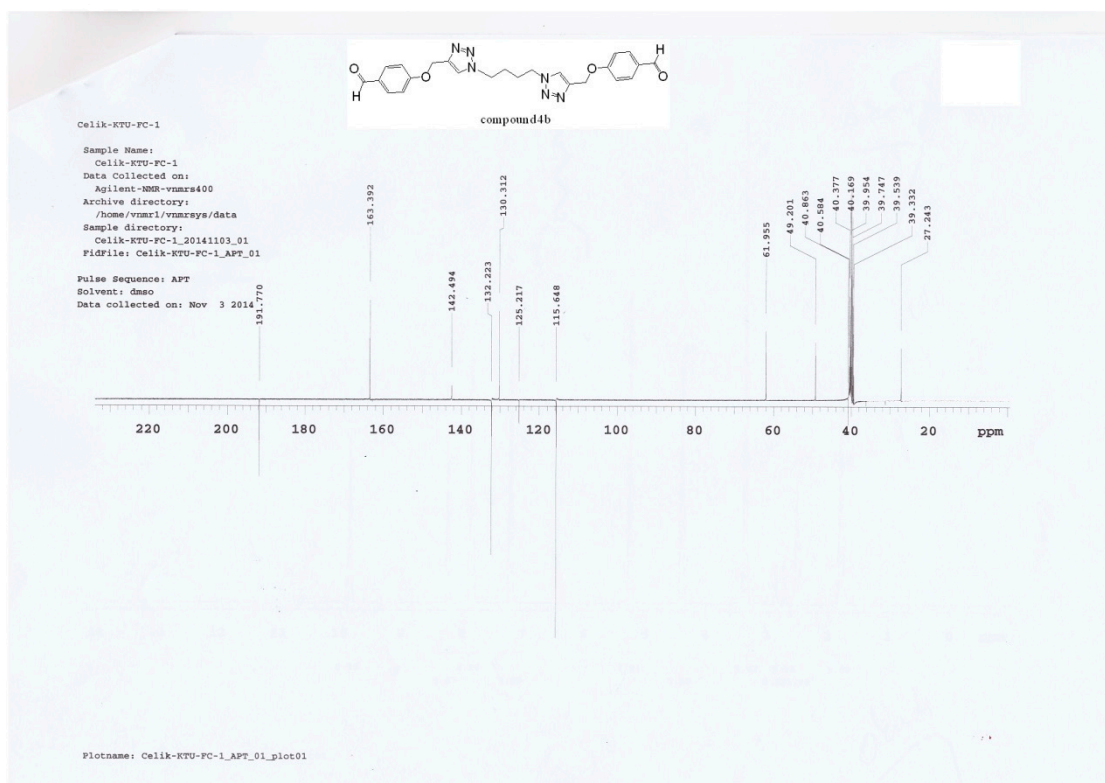Figure S28.  $^{13}\text{C}$ -NMR spectrum of compound 4b.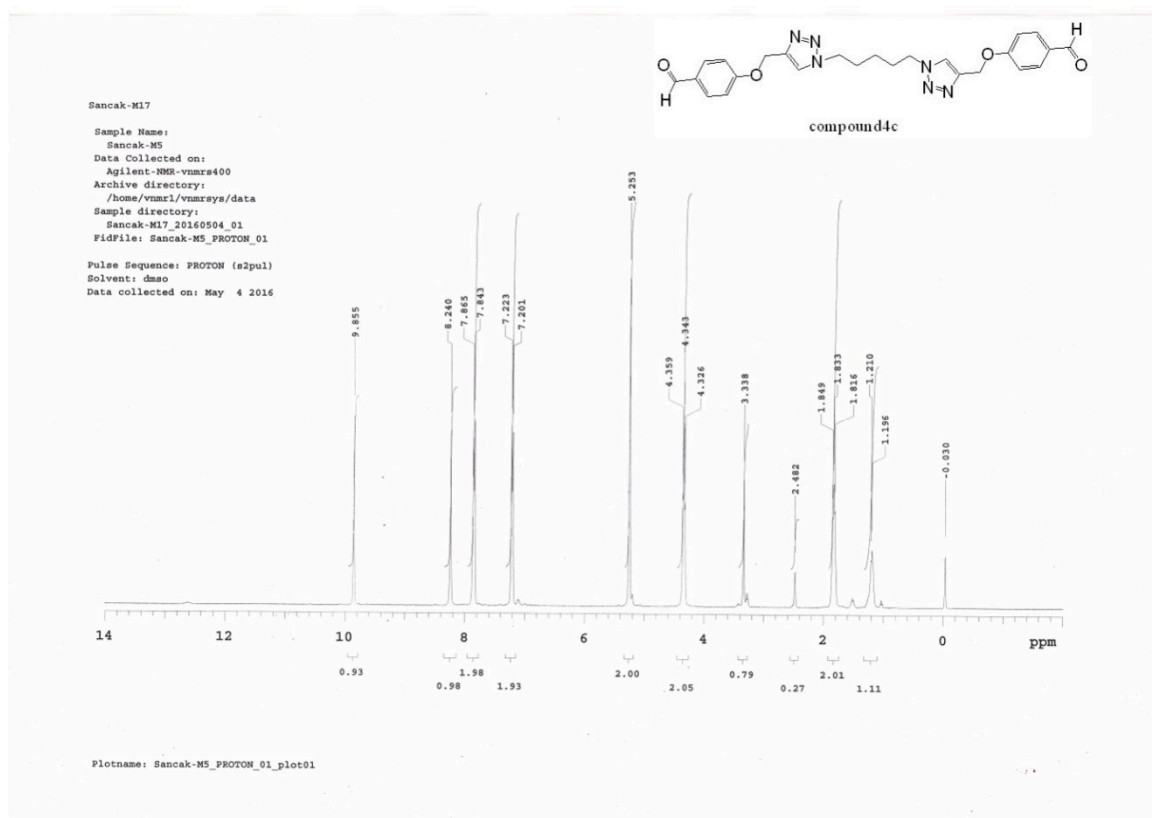Figure S29.  $^1\text{H}$ -NMR spectrum of compound 4c.

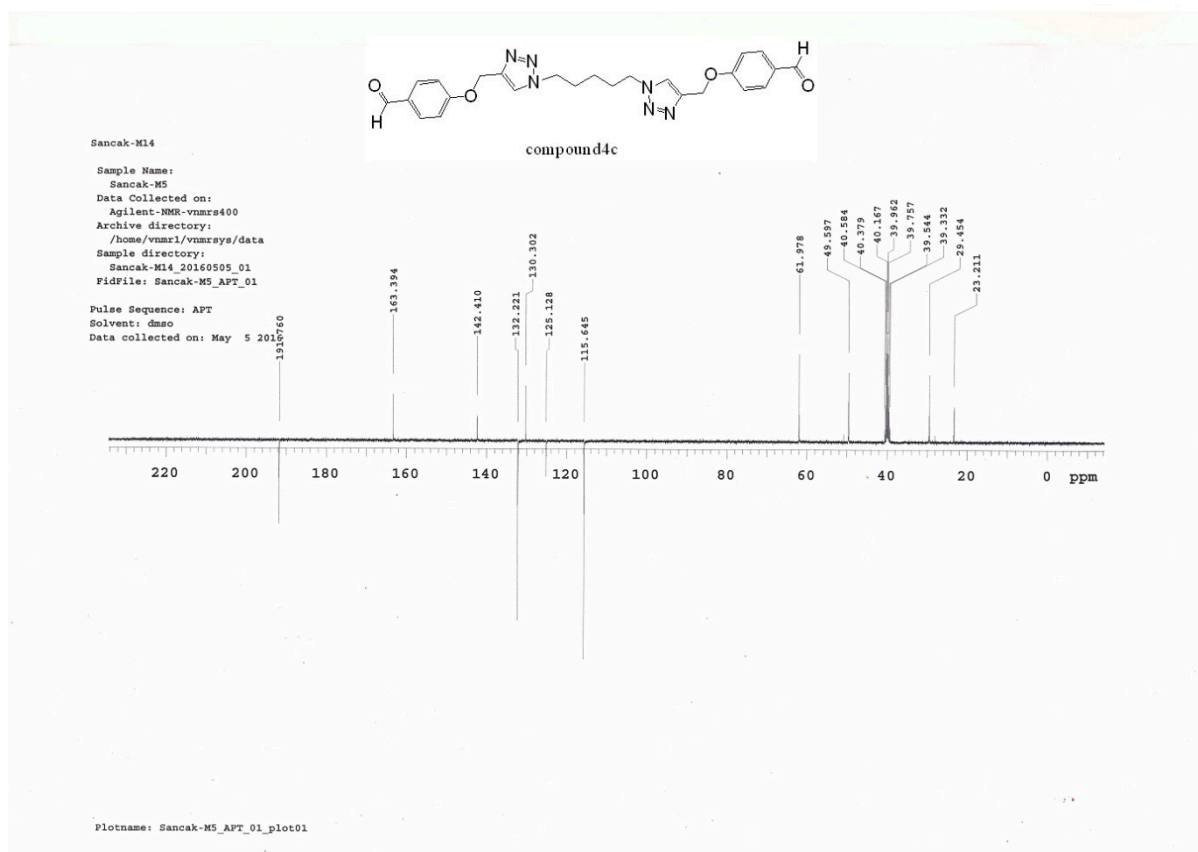Figure S30.  $^{13}\text{C}$ -NMR spectrum of compound 4c.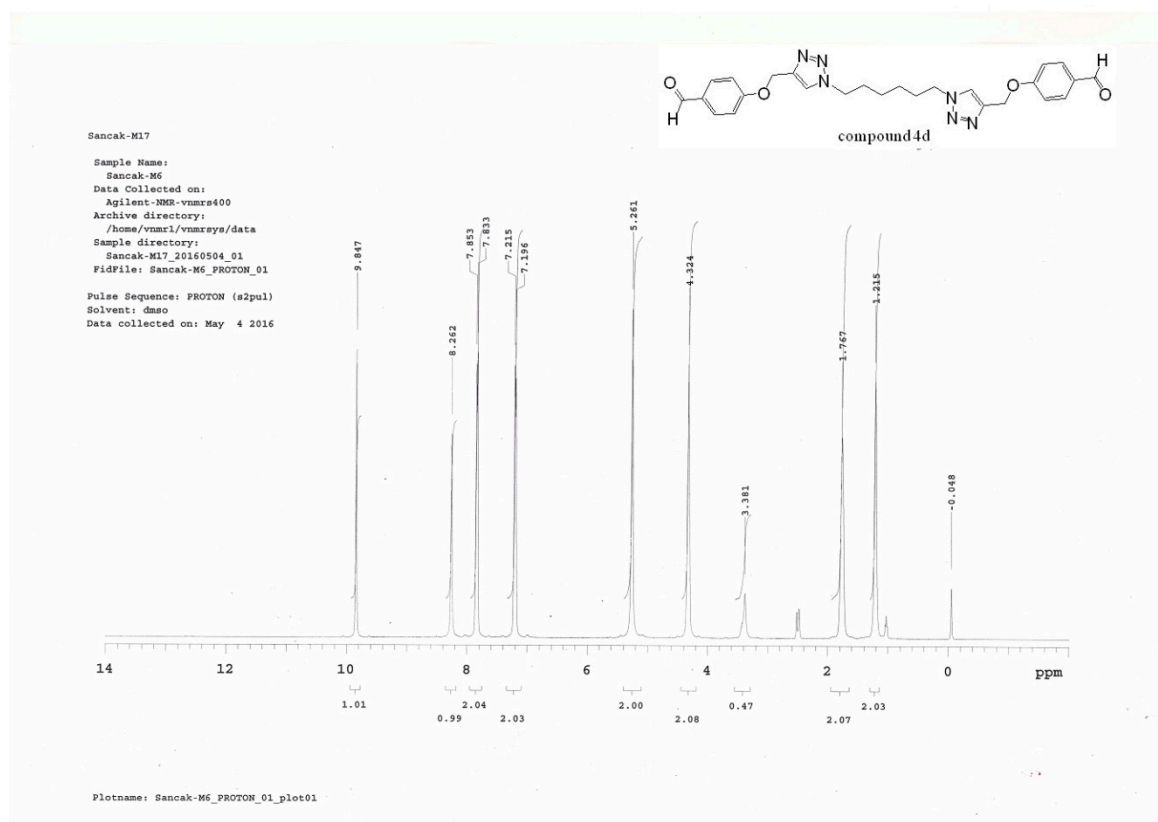Figure S31.  $^1\text{H}$ -NMR spectrum of compound 4d.

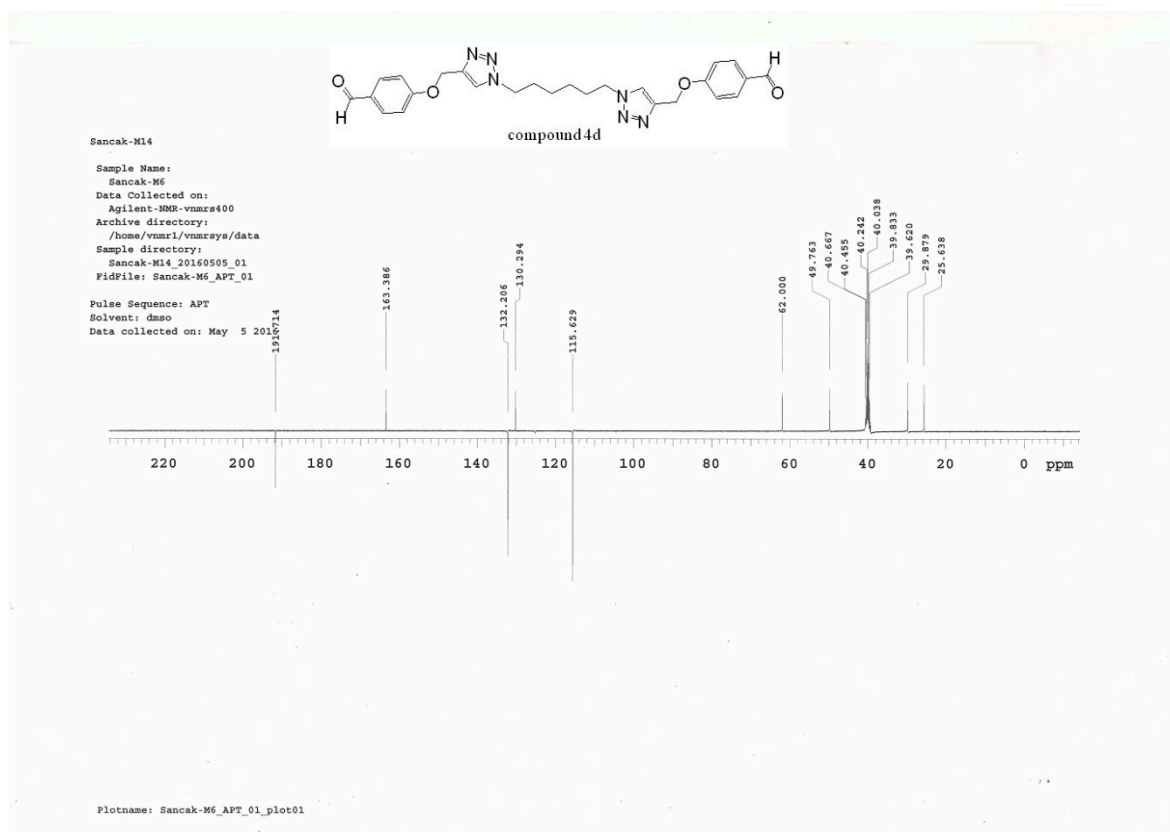Figure S32. <sup>13</sup>C-NMR spectrum of compound 4d.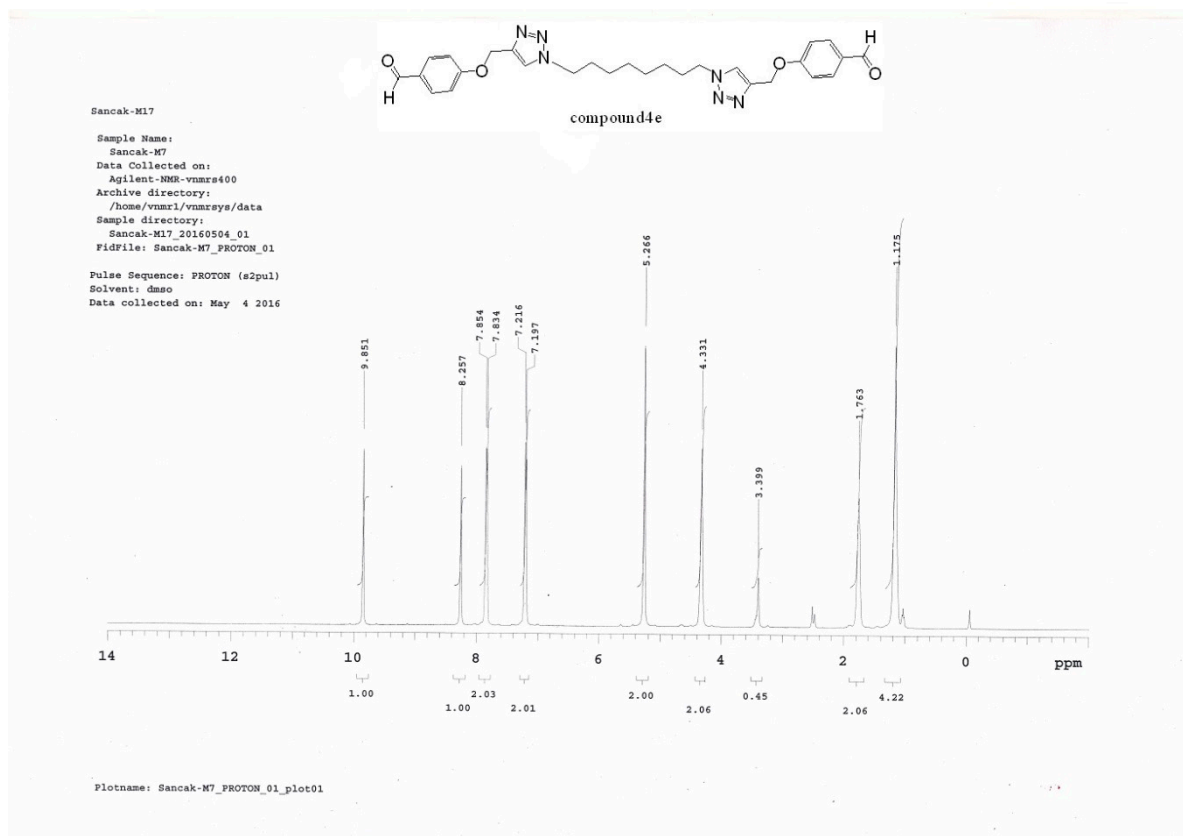Figure S33. <sup>1</sup>H-NMR spectrum of compound 4e.



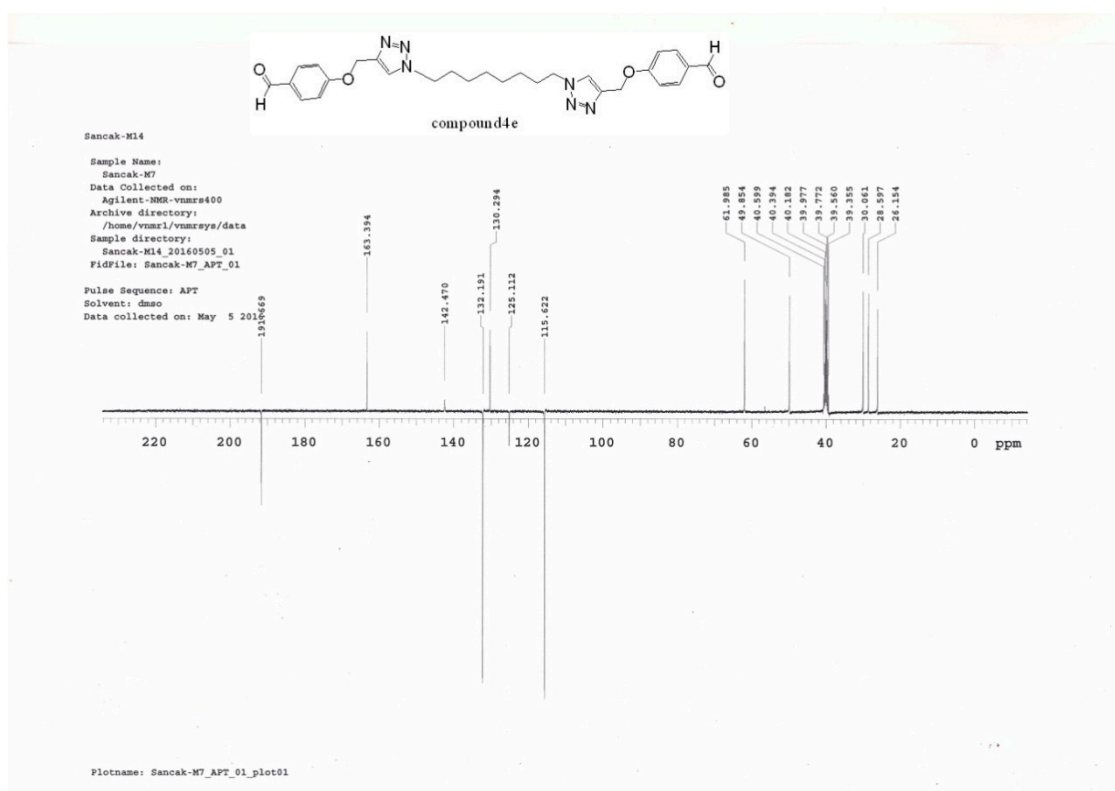

**Figure S34.**  $^{13}\text{C}$ -NMR spectrum of compound 4e.

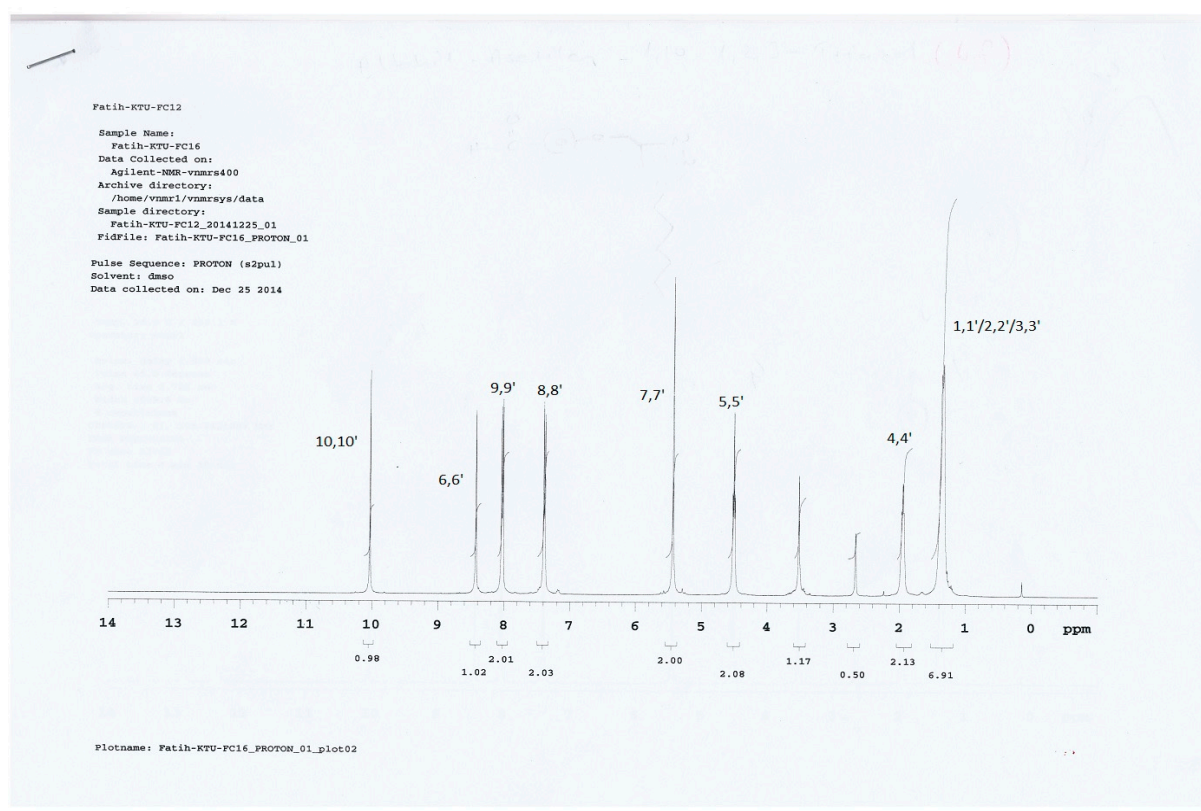

**Figure S35.**  $^1\text{H}$ -NMR spectrum of compound 4f.

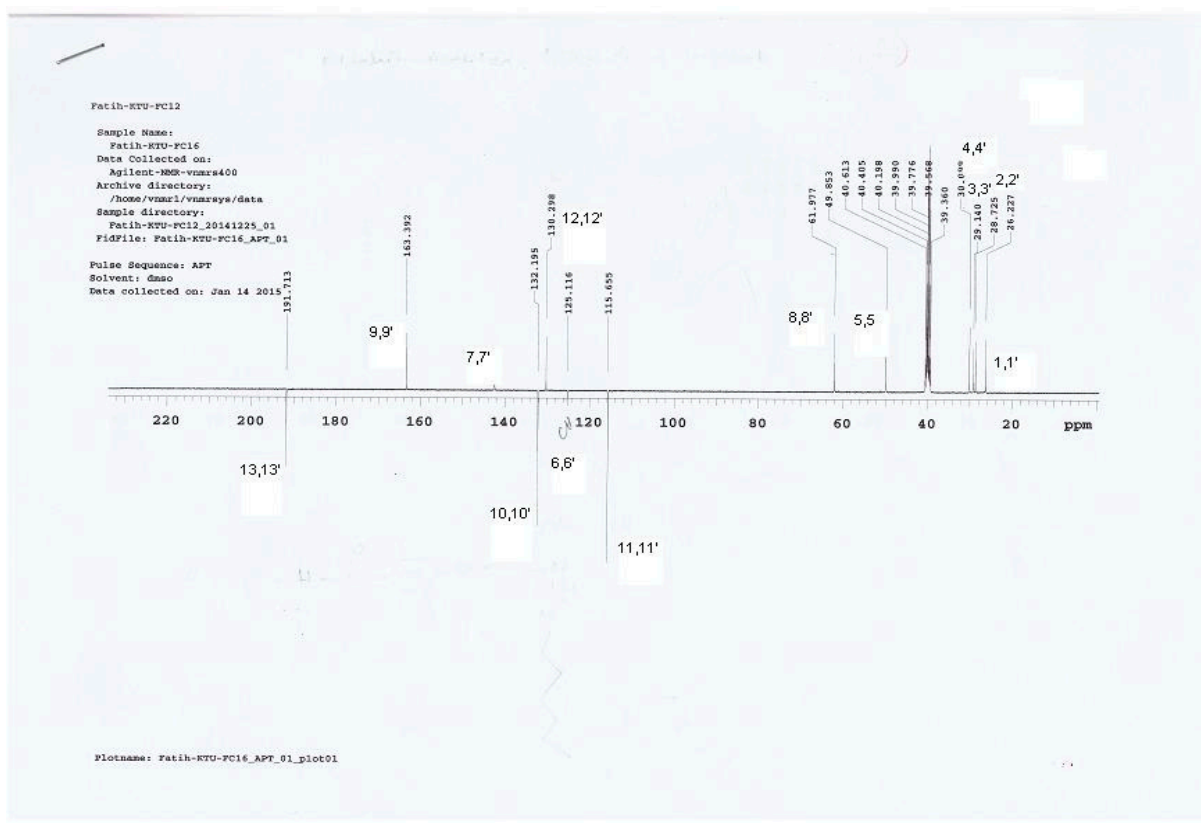Figure S36.  $^{13}\text{C}$ -NMR spectrum of compound 4f.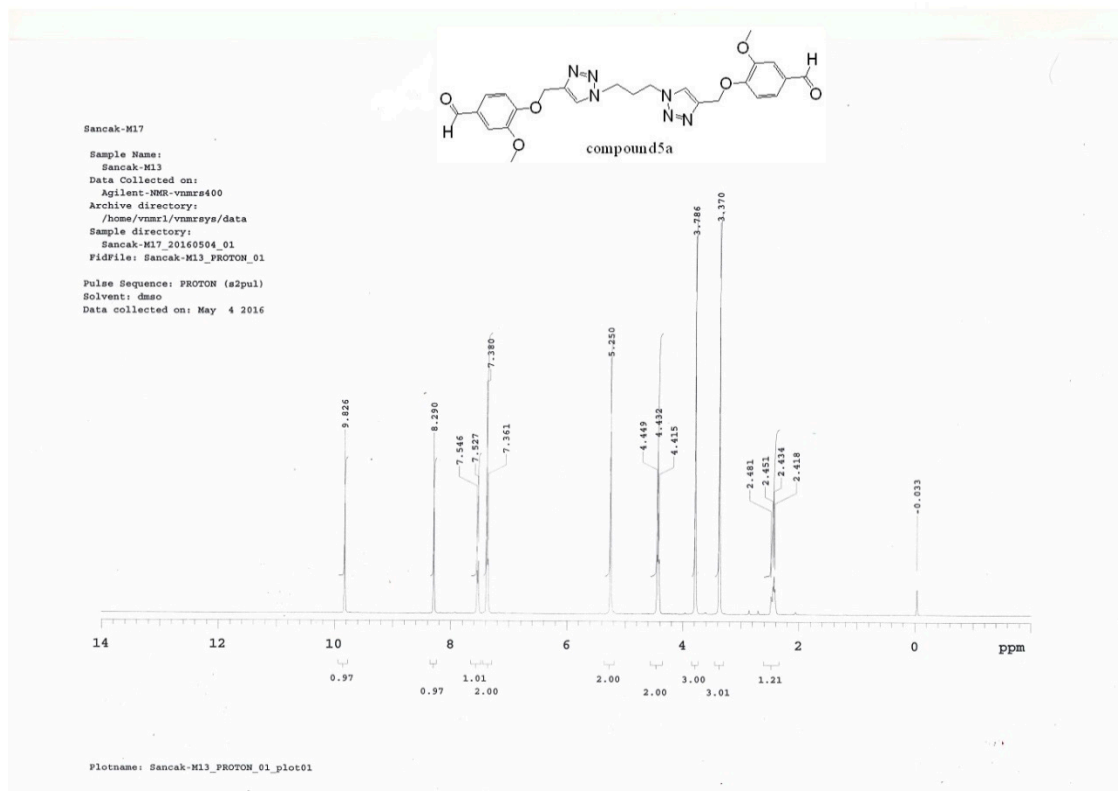Figure S37.  $^1\text{H}$ -NMR spectrum of compound 5a.

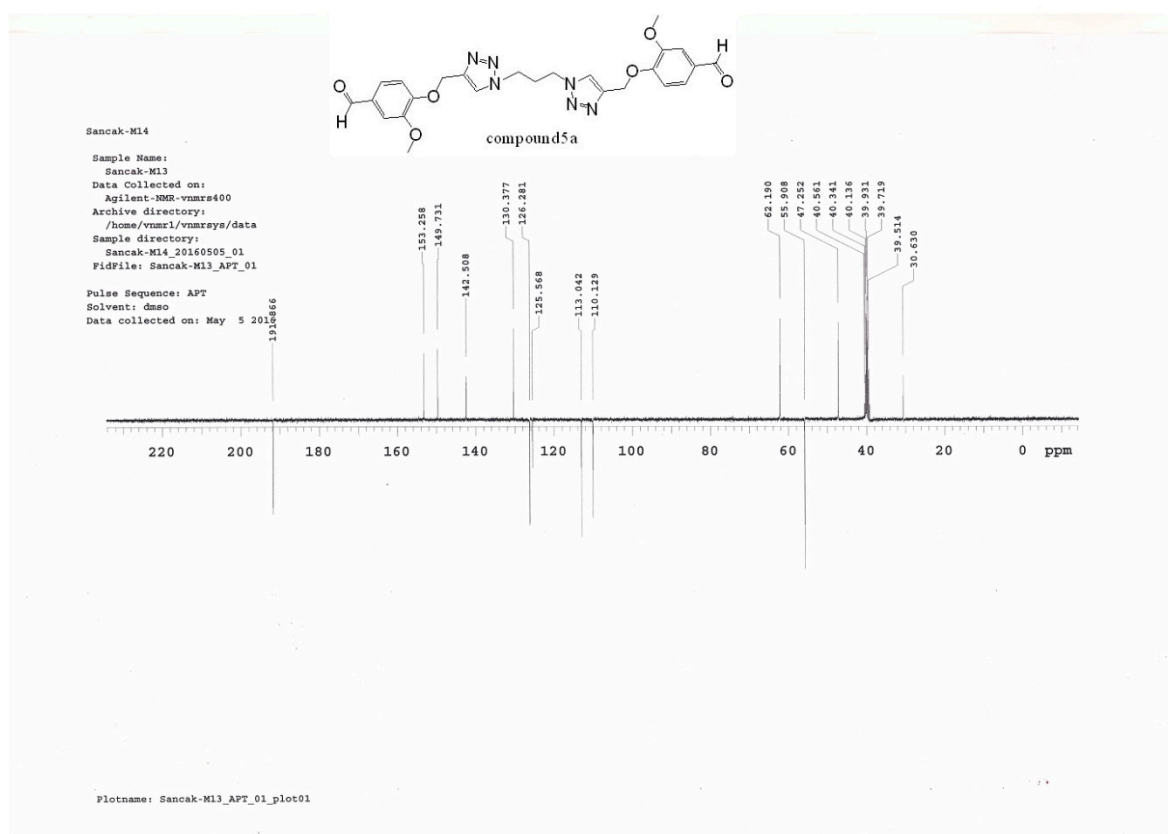Figure S38. <sup>13</sup>C-NMR spectrum of compound 5a.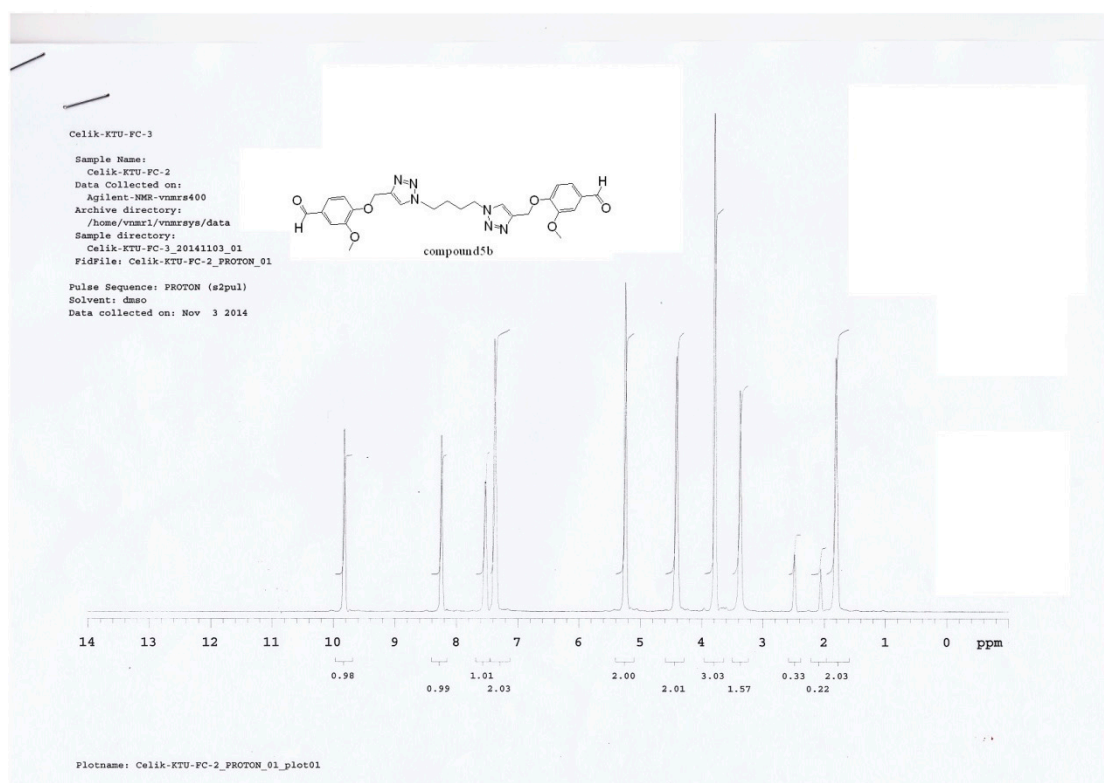Figure S39. <sup>1</sup>H-NMR spectrum of compound 5b.

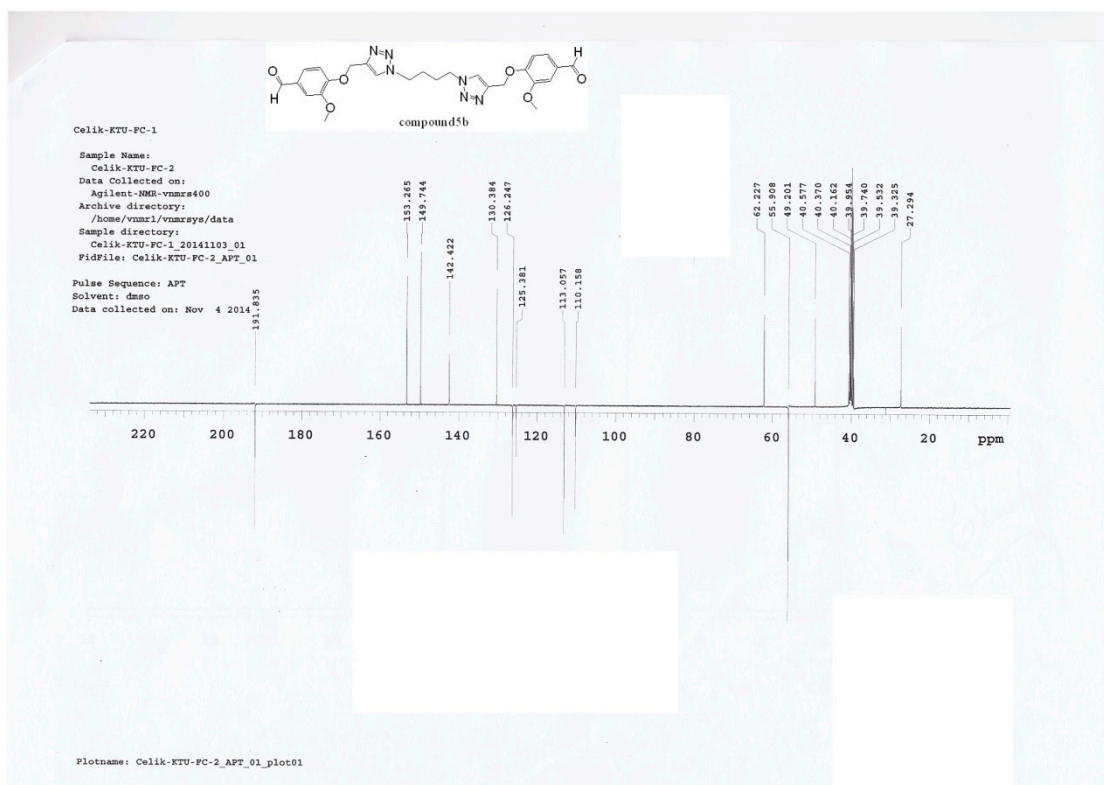Figure S40.  $^{13}\text{C}$ -NMR spectrum of compound 5b.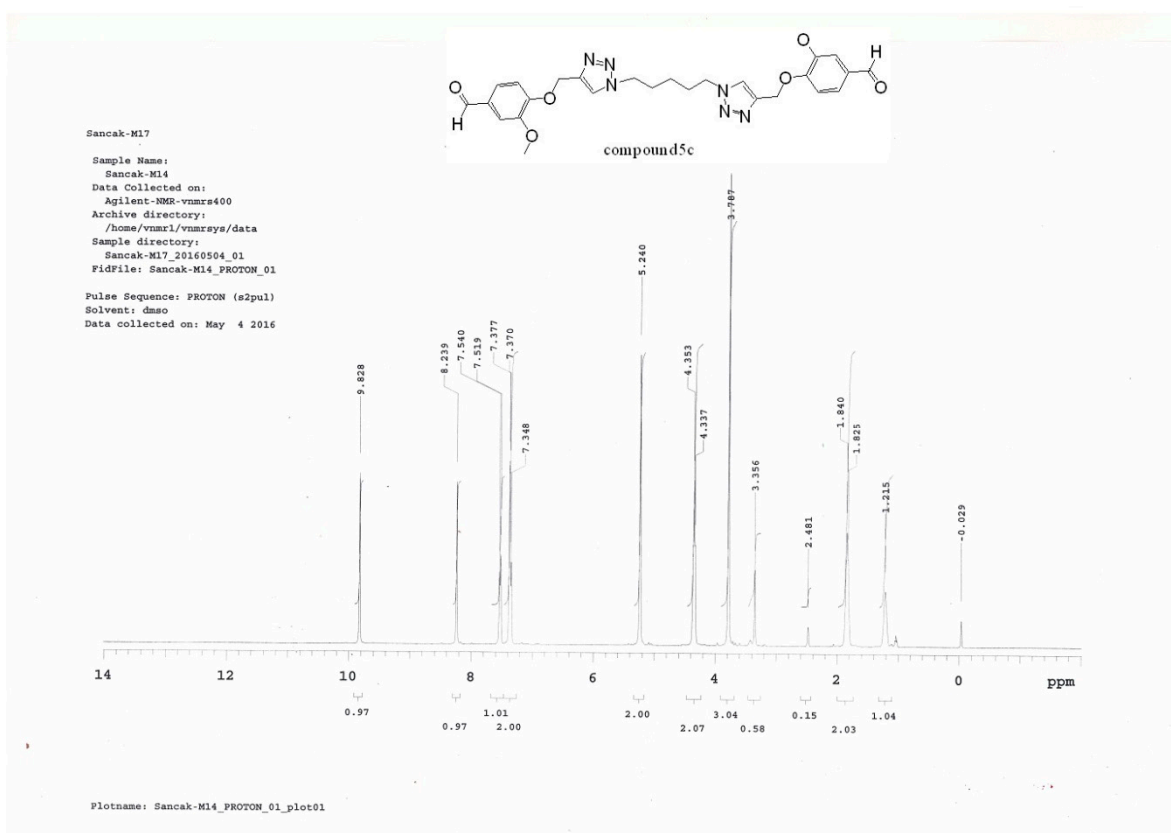Figure S41.  $^1\text{H}$ -NMR spectrum of compound 5c.



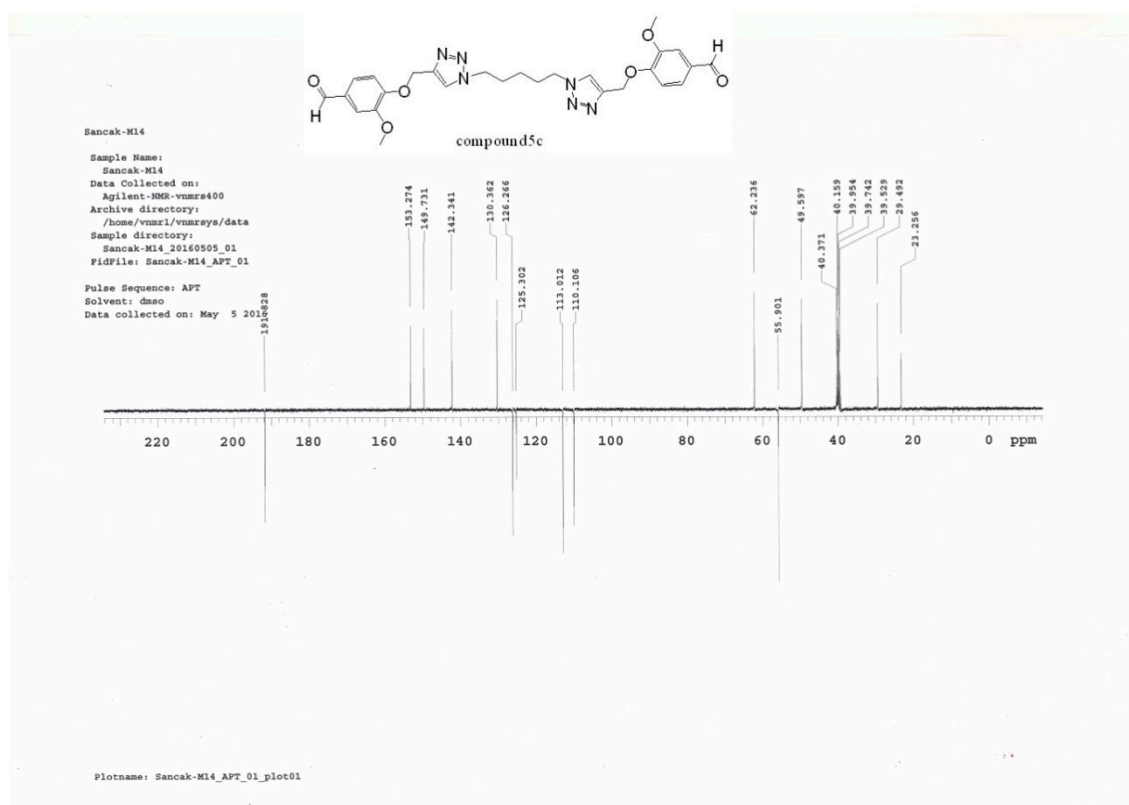Figure S42. <sup>13</sup>C-NMR spectrum of compound 5c.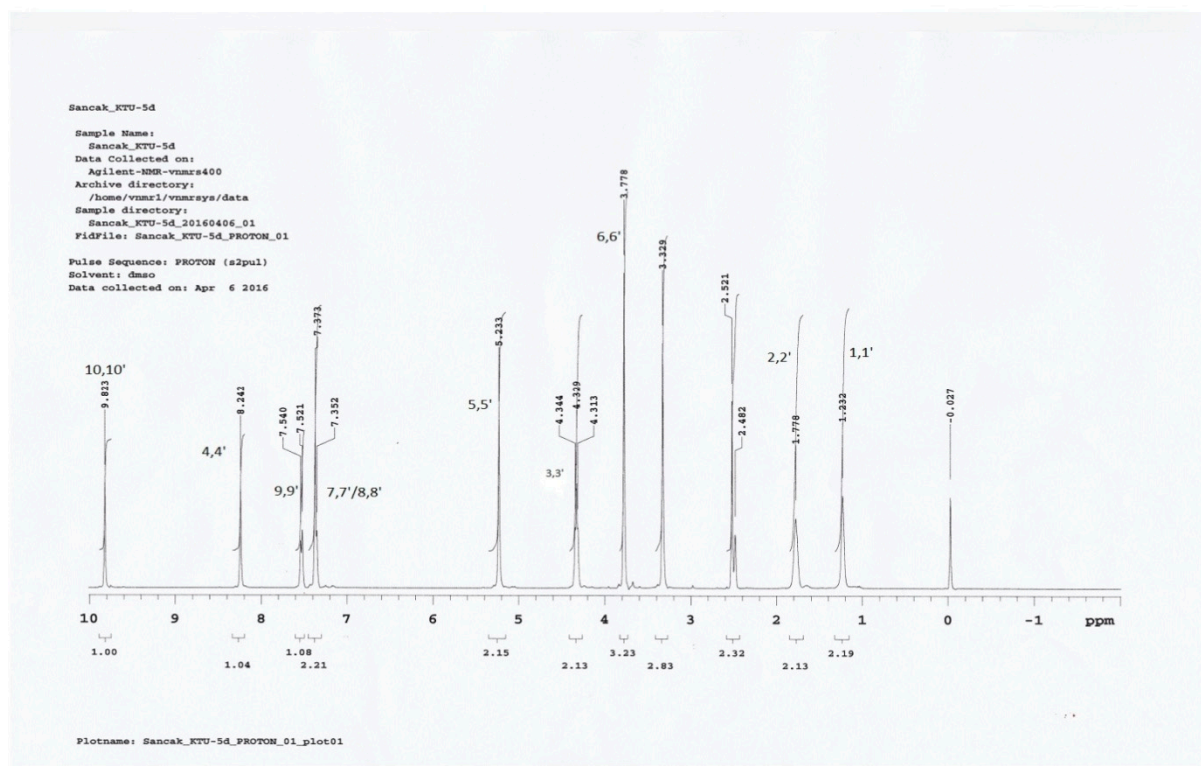Figure S43. <sup>1</sup>H-NMR spectrum of compound 5d.

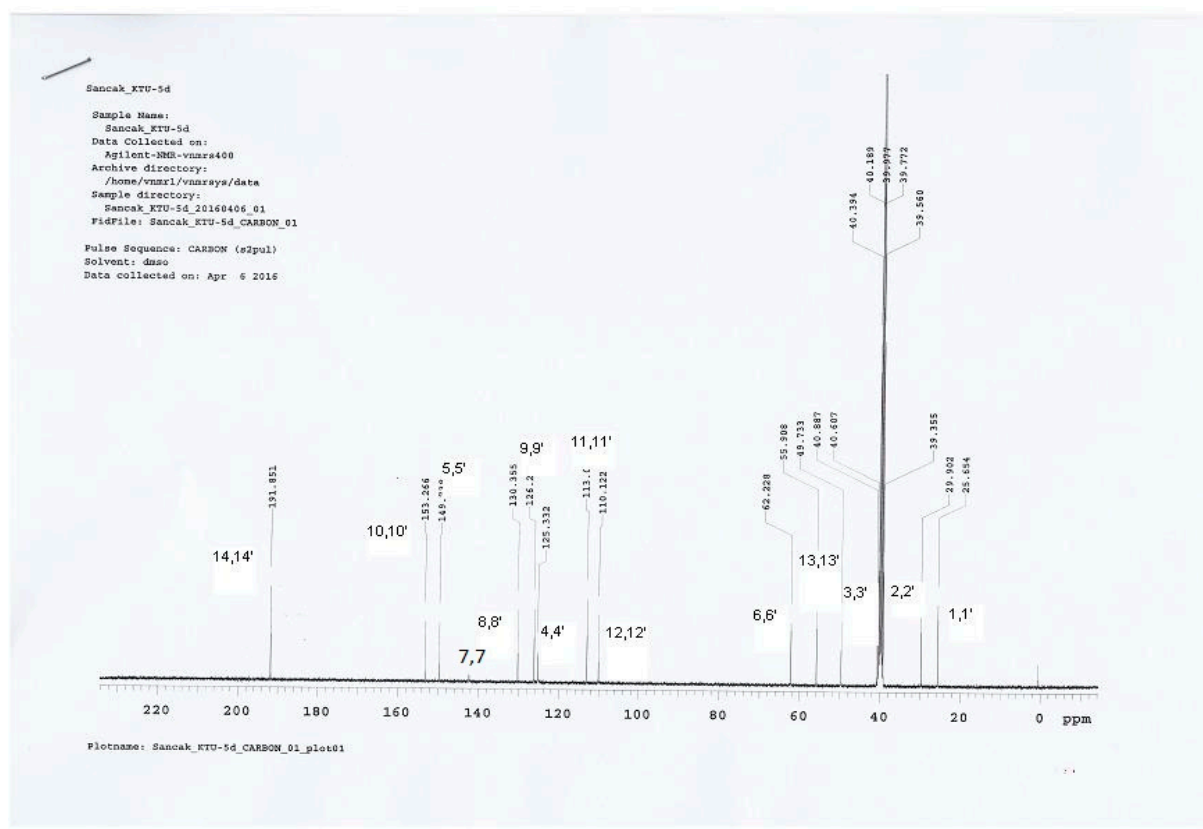Figure S44.  $^{13}\text{C}$ -NMR spectrum of compound 5d.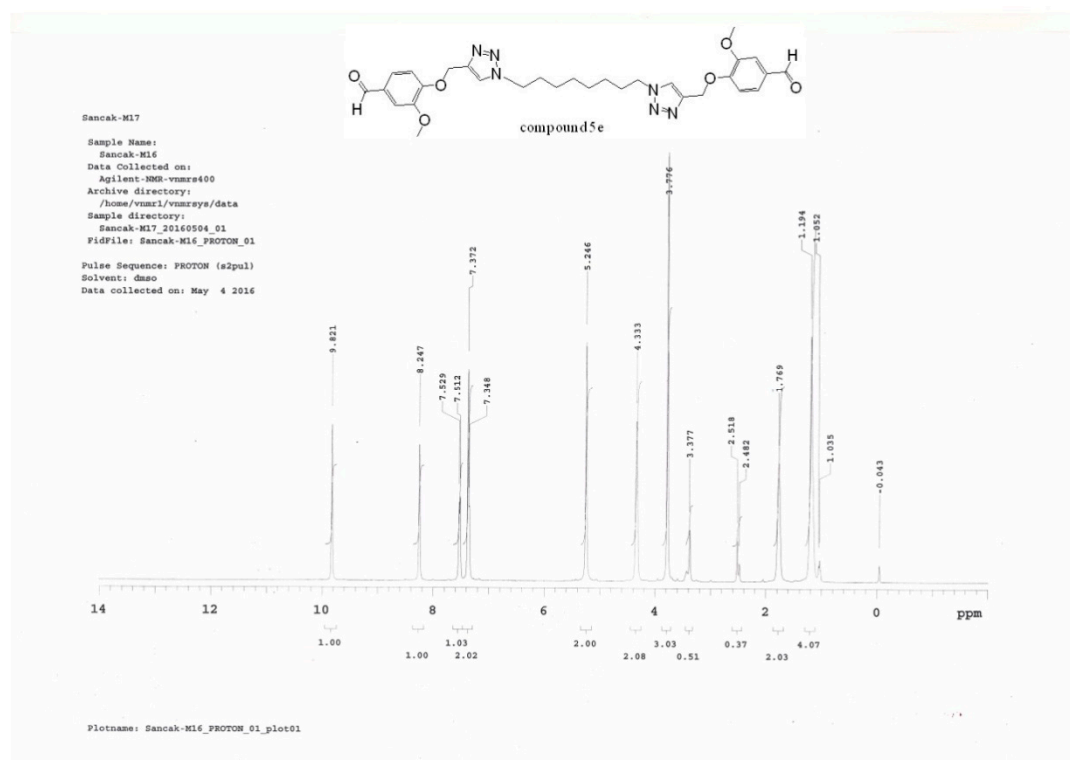Figure S45.  $^1\text{H}$ -NMR spectrum of compound 5e.

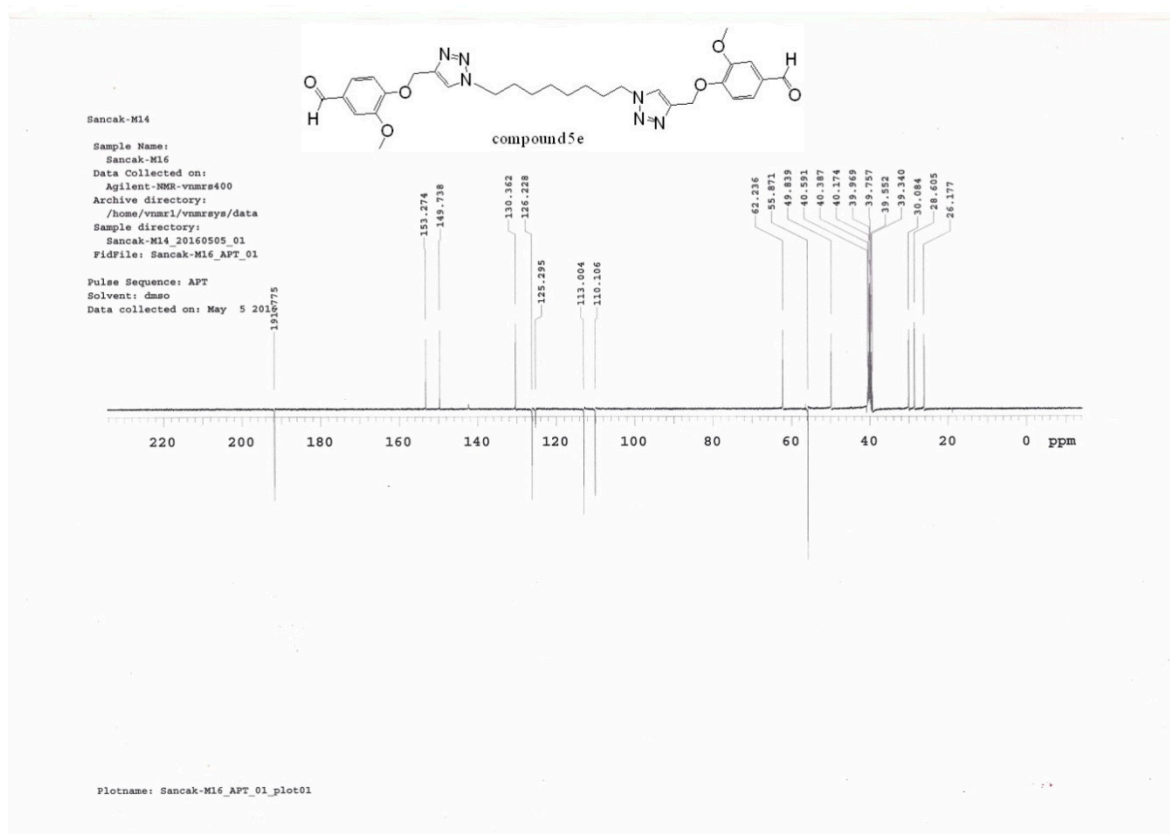Figure S46.  $^{13}\text{C}$ -NMR spectrum of compound 5e.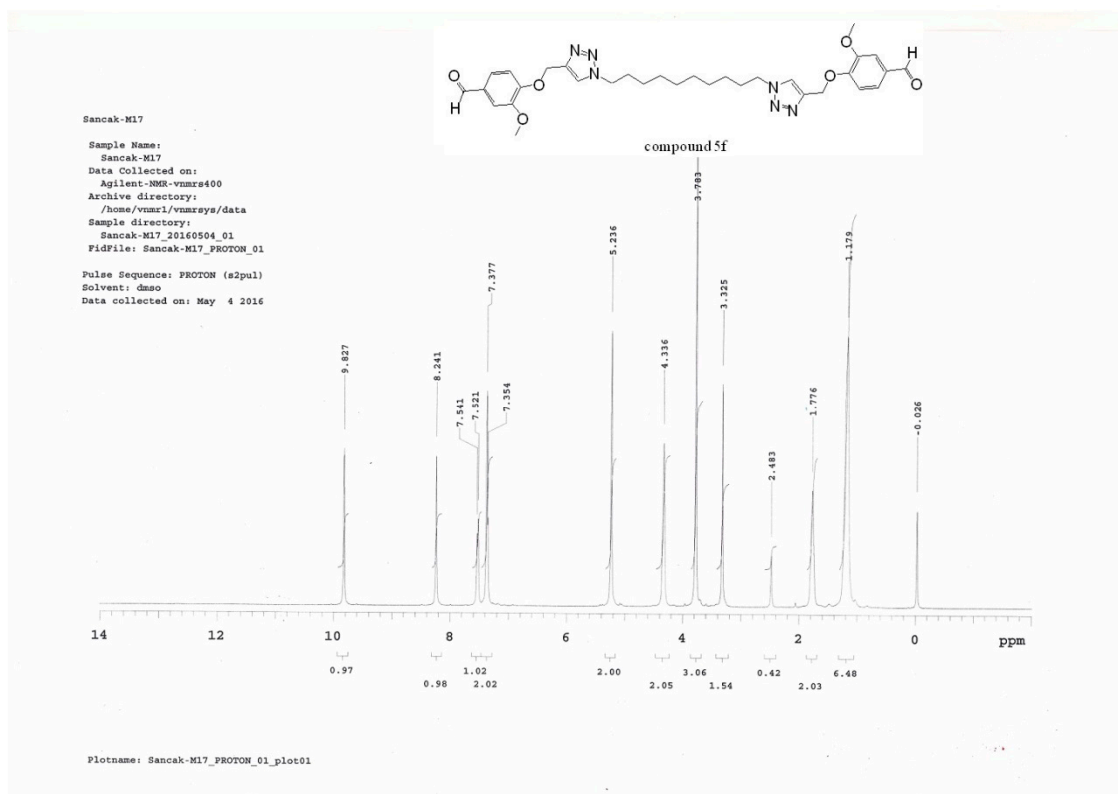Figure S47.  $^1\text{H}$ -NMR spectrum of compound 5f.

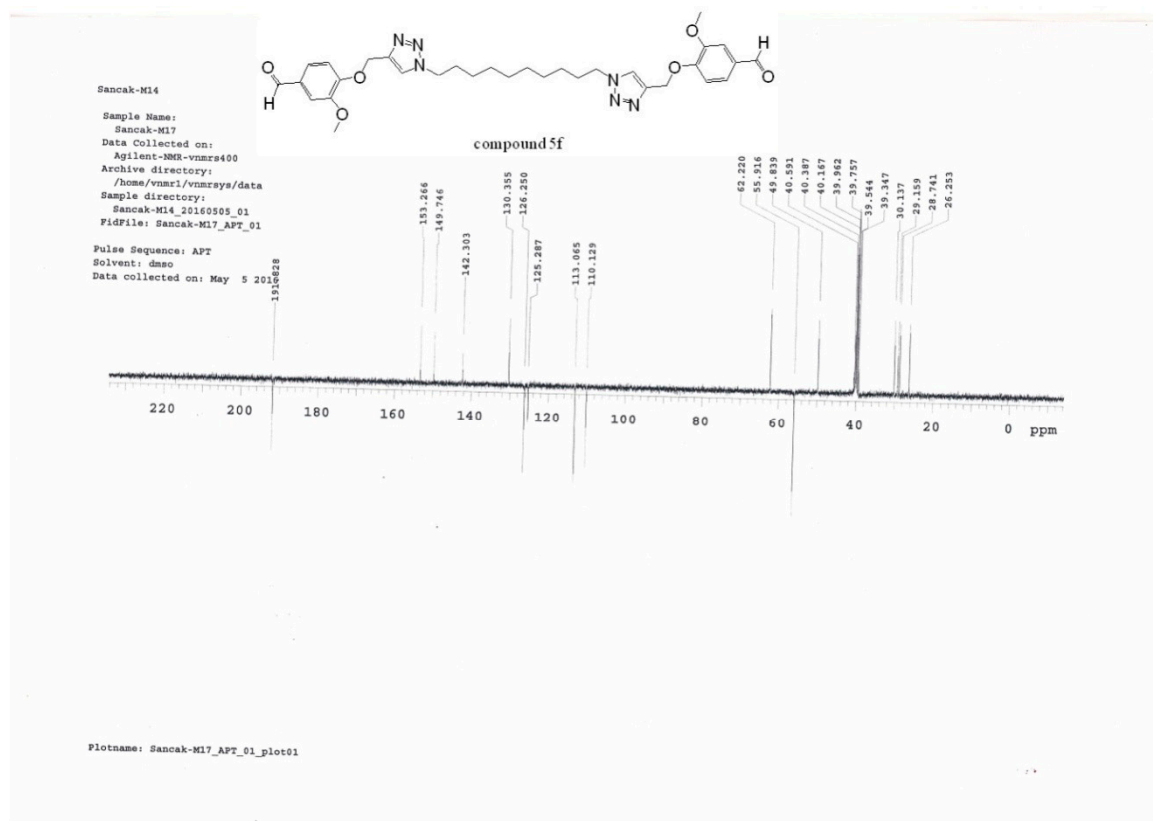

Figure S48.  $^{13}\text{C}$ -NMR spectrum of compound 5f.
